# Supplementary material
Source: PubMed Central journal article supplement (PMC2974596)
Supplement: blood-2010-04-278192_1.pdf [file blood-2010-04-278192_1.pdf]

### ***Partial carotid ligation and flow pattern validation by high resolution ultrasound***

All animal studies were performed with Male C57Bl/6 mice according to the approved IACUC protocol by Emory University. Mice (Jackson Laboratories) were partially ligated between 6 to 8 weeks of age as we recently described<sup>1</sup>. Briefly, three of four caudal branches of left common carotid artery (LCA) - left external carotid, internal carotid, and occipital artery - were ligated with 6-0 silk suture while the superior thyroid artery was left intact in anesthetized mice. Six hours post-surgery, each animal was examined by VEVO 770 High-resolution *in vivo* micro-imaging ultrasound system whether the ligation induced low and oscillatory shear stress in LCA with the contralateral RCA as a control<sup>1</sup>.

### ***Intimal RNA isolation from carotid arteries***

Total RNA from intima were separately obtained from LCA and RCA at 12, 24 and 48 hr post-ligation as we described previously<sup>1</sup>. Briefly, LCA and RCA were quickly flushed (few seconds) with 150  $\mu$ l of QIAzol lysis reagent (QIAGEN) using 29G insulin syringe into a microfuge tube. The eluate was then used for total intimal RNA isolation using miRNeasy mini kit (QIAGEN).

### ***Microarray Procedures***

Total intimal RNAs were obtained from LCA and RCA at 12hr and 48hr post-ligation. Intimal RNAs from three LCAs or RCAs were pooled to obtain ~30 ng total RNA. All RNA samples used for the microarray study passed a quality control test using Agilent BioAnalyze NanoChip. Each sample was linearly amplified by WT-Ovation RNA amplification system (NuGEN) and used for the microarray study using MouseWG-6 v2 Expression BeadChip array with 45,281 probes (Illumina) at the Emory Biomarker Service Center. After hybridization, BeadChips are scanned on the Illumina BeadArray Reader to determine the probe fluorescence intensity. The raw probe intensities were then normalized by the quantile normalization algorithm<sup>2</sup> using the GenomeStudio software from Illumina.

### ***Microarray Data Analysis and Bioinformatics***

The microarray data was statistically analyzed by Significance Analysis of Microarrays software (SAM)<sup>3</sup>. The differentially expressed genes between LCA and RCA were identified for those which showed more than 1.5 fold-changes at <10% false discovery rate. The lists of differentially expressed genes were interrogated for statistically significant overrepresented cellular functions and

disorders using DAVID analysis and Ingenuity Pathway (IPA) Analysis (Ingenuity Systems).

### **Quantitative real time PCR (qPCR) validation**

Total RNA of each sample was reverse transcribed into cDNA using SuperScript III and random primers (Invitrogen) as we described<sup>1</sup>. Briefly, qPCR was performed on selected genes using Brilliant II SYBR Green QPCR Master Mix (Stratagene) with custom designed primers on a Real-Time PCR System (ABI StepOne Plus). Predesigned TaqMan Gene Expression Assay probes (Applied Biosystems) were also used for some selected genes. All qPCR results were normalized based on 18S RNA expression in each sample. Fold changes between LCA and RCA were determined using the  $\Delta\Delta C_t$  method<sup>4</sup>.

### **Immunohistochemical staining**

**Paraffin section immunostaining** – Mice were euthanized by CO<sub>2</sub> inhalation and then were pressure-perfused at 100 mmHg with normal saline followed by pressure fixation with a 10% formalin solution. LCA and RCA were collected *en block* with the trachea and esophagus. Paraffin sections (5  $\mu$ m) were then microwaved for 20 min in citrate buffer (0.1 M, pH 6.0) for BMP4 and LMO4 staining or in Tris buffer (0.1 M, pH 9.0) for Angpt2 and Jam2 staining. Sections were blocked with 10% donkey serum for 1 hour at room temperature and incubated with primary antibodies specific to BMP4 (5  $\mu$ g/ml, Biovision), Lmo4 (5  $\mu$ g/ml,<sup>5-7</sup>), Jam2 (2  $\mu$ g/ml, R&D System), and Angpt2 (0.4  $\mu$ g/ml, Santa Cruz) overnight at 4°C in a humidified chamber<sup>8</sup>. To visualize primary antibodies, rhodamine-conjugated secondary antibodies (donkey anti-goat, anti-rat IgG, Jackson) were used for one hour at room temperature. Nuclei were counter stained with Hoechst #33258. All photographs were taken using a Zeiss epifluorescent microscope. Paraffin sections of human coronary arteries from patients undergoing heart transplants were obtained with the patients' consent according to the IRB protocol approved at Emory as described previously<sup>8</sup>. The same staining method used for mouse carotids as described above was used for Lmo4 staining.

**En Face staining** - Mice were euthanized by CO<sub>2</sub> inhalation and the aortas were pressure-perfused at 100 mmHg with normal saline followed by pressure fixation with a 10% formalin solution. The aortas were carefully dissected *in situ* and the aortic arches and thoracic aortas were dissected and stained with Lmo4 antibody<sup>5-7</sup>, followed by rhodamine-conjugated secondary antibodies for 2 hours at room temperature. The aortas were then mounted on glass slides using Vectashield containing DAPI (Vector Laboratories). They were then opened and lesser curvature and the greater curvature of the arch were separated. *En face* images were obtained using a Zeiss LSM 510 META confocal microscope.

### **Ex vivo tissue culture**

Mice were euthanized by CO<sub>2</sub> inhalation and then pressure-perfused with heparinized normal saline. Under sterile conditions, common carotid arteries were harvested and carefully cleaned of perivascular fat. Carotid artery rings (~3 mm) and incubated for 3 to 5 days at 37 °C and 5% CO<sub>2</sub> in Dulbecco's Modified Eagle Medium (DMEM) supplemented with 100 U/mL of penicillin and 100 µg/mL of streptomycin and 10% of heat-inactivated fetal bovine serum.

### **Statistical analysis**

Data are presented as mean±SEM. Paired Student's t-test was carried out for all qPCR results of each gene to compare LCA vs. RCA and  $p < 0.05$  ( $n = 3-5$ ) was considered statistically significant.

### **REFERENCES**

1. Nam D, Ni CW, Rezvan A, et al. Partial carotid ligation is a model of acutely induced disturbed flow, leading to rapid endothelial dysfunction and atherosclerosis. *Am J Physiol Heart Circ Physiol.* 2009;297:H1535-1543.
2. Bolstad BM, Irizarry RA, Astrand M, Speed TP. A comparison of normalization methods for high density oligonucleotide array data based on variance and bias. *Bioinformatics.* 2003;19:185-193.
3. Tusher VG, Tibshirani R, Chu G. Significance analysis of microarrays applied to the ionizing radiation response. *Proc Natl Acad Sci U S A.* 2001;98:5116-5121.
4. Schmittgen TD, Livak KJ. Analyzing real-time PCR data by the comparative C(T) method. *Nat Protoc.* 2008;3:1101-1108.
5. Sum EY, Shackleton M, Hahm K, et al. Loss of the LIM domain protein Lmo4 in the mammary gland during pregnancy impedes lobuloalveolar development. *Oncogene.* 2005;24:4820-4828.
6. Sum EY, Segara D, Duscio B, et al. Overexpression of LMO4 induces mammary hyperplasia, promotes cell invasion, and is a predictor of poor outcome in breast cancer. *Proc Natl Acad Sci U S A.* 2005;102:7659-7664.
7. Visvader JE, Venter D, Hahm K, et al. The LIM domain gene LMO4 inhibits differentiation of mammary epithelial cells in vitro and is overexpressed in breast cancer. *Proc Natl Acad Sci U S A.* 2001;98:14452-14457.
8. Chang K, Weiss D, Suo J, et al. Bone morphogenic protein antagonists are coexpressed with bone morphogenic protein 4 in endothelial cells exposed to unstable flow in vitro in mouse aortas and in human coronary arteries: role of bone morphogenic protein antagonists in inflammation and atherosclerosis. *Circulation.* 2007;116:1258-1266.

Table S.1 The list of gene probes identified as significant expressed in microarray

| 12hr Down-regulated gene probes (LCA/RCA) (38) |                      |          |              |                   |             |            | 12hr Up-regulated gene probes (LCA/RCA) (29) |                      |          |              |                   |             |            |
|------------------------------------------------|----------------------|----------|--------------|-------------------|-------------|------------|----------------------------------------------|----------------------|----------|--------------|-------------------|-------------|------------|
| Gene ID                                        | Gene Name            | Score(d) | Numerator(r) | Denominator(s+s0) | Fold Change | q-value(%) | Gene ID                                      | Gene Name            | Score(d) | Numerator(r) | Denominator(s+s0) | Fold Change | q-value(%) |
| ILMN_1232928                                   | <u>Timp3</u>         | 25.53    | 347.03       | 13.59             | 0.61        | 0.00       | ILMN_1235698                                 | <u>Bmp4</u>          | -17.05   | -285.04      | 16.72             | 1.54        | 0.00       |
| ILMN_2604029                                   | <u>Klf2</u>          | 15.76    | 204.23       | 12.96             | 0.30        | 0.00       | ILMN_2593496                                 | <u>Got2</u>          | -16.37   | -103.56      | 6.33              | 1.68        | 0.00       |
| ILMN_2686883                                   | <u>Gnaq</u>          | 13.56    | 112.33       | 8.28              | 0.66        | 0.00       | ILMN_2909150                                 | <u>Ctgf</u>          | -13.70   | -1531.93     | 111.85            | 4.81        | 0.00       |
| ILMN_2697304                                   | <u>Eln</u>           | 12.97    | 664.84       | 51.24             | 0.56        | 0.00       | ILMN_2932964                                 | <u>Ctsp</u>          | -12.10   | -190.35      | 15.73             | 2.03        | 0.00       |
| ILMN_1235077                                   | <u>Capn2</u>         | 12.97    | 113.98       | 8.79              | 0.55        | 0.00       | ILMN_1239386                                 | <u>GaInt2</u>        | -12.01   | -188.83      | 15.73             | 2.56        | 0.00       |
| ILMN_2595664                                   | <u>Dhh</u>           | 12.33    | 467.52       | 37.91             | 0.50        | 0.00       | ILMN_2451036                                 | <u>LOC100047093</u>  | -11.79   | -736.61      | 62.46             | 1.91        | 0.00       |
| ILMN_2672190                                   | <u>Id1</u>           | 12.05    | 131.11       | 10.88             | 0.59        | 0.00       | ILMN_1244612                                 | <u>GaInt2</u>        | -11.75   | -547.54      | 46.58             | 1.82        | 0.00       |
| ILMN_2880906                                   | <u>Pdlim2</u>        | 10.44    | 167.75       | 16.07             | 0.50        | 2.54       | ILMN_2694569                                 | <u>LOC631037</u>     | -9.82    | -156.24      | 15.90             | 1.59        | 9.02       |
| ILMN_2750053                                   | <u>Ptprj</u>         | 10.43    | 459.92       | 44.08             | 0.53        | 2.54       | ILMN_1228475                                 | <u>Ulk1</u>          | -9.32    | -176.19      | 18.91             | 1.64        | 9.02       |
| ILMN_2424721                                   | <u>Pdgfra</u>        | 9.84     | 183.84       | 18.68             | 0.54        | 4.78       | ILMN_1236958                                 | <u>Gabarapl1</u>     | -9.29    | -639.61      | 68.86             | 1.54        | 9.02       |
| ILMN_2634083                                   | <u>Cdkn1a</u>        | 9.17     | 164.57       | 17.95             | 0.54        | 7.17       | ILMN_2642403                                 | <u>Lmp4</u>          | -8.85    | -133.04      | 15.03             | 1.82        | 9.02       |
| ILMN_2618408                                   | <u>Icam2</u>         | 9.01     | 325.97       | 36.18             | 0.53        | 7.17       | ILMN_1231490                                 | <u>2410006H16Rik</u> | -8.50    | -66.77       | 7.86              | 2.17        | 9.37       |
| ILMN_2745876                                   | <u>BC0200353</u>     | 8.54     | 228.48       | 26.75             | 0.60        | 7.17       | ILMN_2595660                                 | <u>Phactr1</u>       | -8.46    | -368.96      | 43.59             | 2.10        | 9.37       |
| ILMN_1220170                                   | <u>Tek</u>           | 8.09     | 271.04       | 33.50             | 0.64        | 7.17       | ILMN_1213034                                 | <u>2010312A17Rik</u> | -8.34    | -60.24       | 7.22              | 1.52        | 9.37       |
| ILMN_2498731                                   | <u>E030024M20Rik</u> | 8.01     | 200.79       | 25.05             | 0.48        | 7.17       | ILMN_2741621                                 | <u>Birc2</u>         | -8.12    | -48.14       | 5.93              | 1.79        | 9.37       |
| ILMN_2950503                                   | <u>Dab2ip</u>        | 7.94     | 82.96        | 10.45             | 0.66        | 7.17       | ILMN_2790373                                 | <u>Snn</u>           | -7.89    | -86.61       | 10.98             | 1.63        | 9.56       |
| ILMN_2999439                                   | <u>Klifa</u>         | 7.57     | 162.86       | 21.52             | 0.48        | 7.17       | ILMN_1258158                                 | <u>Aldh6a1</u>       | -7.63    | -89.06       | 11.67             | 1.76        | 9.56       |
| ILMN_2675760                                   | <u>2310046K01Rik</u> | 7.52     | 181.95       | 24.20             | 0.46        | 7.17       | ILMN_2888552                                 | <u>Slc1a4</u>        | -7.48    | -106.66      | 14.25             | 1.90        | 9.56       |
| ILMN_2976129                                   | <u>Tinagl</u>        | 7.30     | 300.71       | 41.21             | 0.60        | 7.17       | ILMN_2977558                                 | <u>Dapk2</u>         | -7.47    | -145.95      | 19.53             | 4.43        | 9.56       |
| ILMN_2773211                                   | <u>Kras</u>          | 7.16     | 51.76        | 7.23              | 0.54        | 7.17       | ILMN_2909336                                 | <u>Gpm6a</u>         | -7.42    | -248.37      | 33.47             | 2.23        | 9.56       |
| ILMN_2608133                                   | <u>Rhpn2</u>         | 7.14     | 358.28       | 50.18             | 0.48        | 7.17       | ILMN_1238215                                 | <u>Ctgf</u>          | -7.21    | -716.25      | 99.35             | 6.13        | 9.56       |
| ILMN_1216781                                   | <u>Rab11fp5</u>      | 7.10     | 173.70       | 24.45             | 0.57        | 7.17       | ILMN_2471996                                 | <u>Al317223</u>      | -7.12    | -69.95       | 9.83              | 2.52        | 9.56       |
| ILMN_2587084                                   | <u>C230099C22Rik</u> | 6.96     | 63.54        | 9.13              | 0.60        | 7.17       | ILMN_1234487                                 | <u>Angpt2</u>        | -7.07    | -58.39       | 8.26              | 1.97        | 9.56       |
| ILMN_2866267                                   | <u>F2r1</u>          | 6.88     | 128.94       | 18.75             | 0.56        | 7.17       | ILMN_1213034                                 | <u>Ier3</u>          | -7.02    | -447.96      | 63.85             | 1.65        | 9.56       |
| ILMN_2789562                                   | <u>P4ha2</u>         | 6.83     | 141.49       | 20.71             | 0.66        | 7.17       | ILMN_1252481                                 | <u>Fosl2</u>         | -6.95    | -303.04      | 43.62             | 1.79        | 9.56       |
| ILMN_1247916                                   | <u>Lims2</u>         | 6.73     | 96.99        | 14.40             | 0.51        | 7.17       | ILMN_1215136                                 | <u>Scn3b</u>         | -6.74    | -45.96       | 6.82              | 1.73        | 9.56       |
| ILMN_1231445                                   | <u>lnmt</u>          | 6.57     | 77.88        | 11.85             | 0.35        | 7.17       | ILMN_1223313                                 | <u>Fn3k</u>          | -6.64    | -51.35       | 7.73              | 1.63        | 9.56       |
| ILMN_2683586                                   | <u>Capn2</u>         | 6.49     | 130.67       | 20.13             | 0.63        | 7.45       | ILMN_2711966                                 | <u>Mrpl1</u>         | -6.62    | -62.59       | 9.46              | 1.87        | 9.56       |
| ILMN_2710274                                   | <u>Slc9a3r2</u>      | 6.41     | 572.81       | 89.38             | 0.48        | 7.45       | ILMN_1230596                                 | <u>E030033D05Rik</u> | -6.34    | -240.87      | 38.00             | 1.64        | 10.00      |
| ILMN_1229745                                   | <u>Sertad4</u>       | 6.39     | 163.24       | 25.54             | 0.62        | 7.45       |                                              |                      |          |              |                   |             |            |
| ILMN_3140516                                   | <u>Rapgef1</u>       | 6.32     | 103.56       | 16.39             | 0.58        | 7.45       |                                              |                      |          |              |                   |             |            |
| ILMN_2641228                                   | <u>Hspa12b</u>       | 6.28     | 300.72       | 47.88             | 0.46        | 7.45       |                                              |                      |          |              |                   |             |            |
| ILMN_2738345                                   | <u>Lims2</u>         | 5.76     | 81.77        | 14.20             | 0.65        | 9.70       |                                              |                      |          |              |                   |             |            |
| ILMN_2699637                                   | <u>Lsr</u>           | 5.74     | 113.06       | 19.69             | 0.51        | 9.70       |                                              |                      |          |              |                   |             |            |
| ILMN_1243407                                   | <u>Klkl10</u>        | 5.73     | 931.40       | 162.41            | 0.31        | 9.70       |                                              |                      |          |              |                   |             |            |
| ILMN_2689207                                   | <u>Col6a3</u>        | 5.70     | 47.59        | 8.35              | 0.49        | 9.70       |                                              |                      |          |              |                   |             |            |
| ILMN_2774056                                   | <u>Cmklr1</u>        | 5.59     | 34.09        | 6.10              | 0.60        | 9.70       |                                              |                      |          |              |                   |             |            |
| ILMN_1212703                                   | <u>Kras</u>          | 5.57     | 181.54       | 32.58             | 0.50        | 9.70       |                                              |                      |          |              |                   |             |            |

  

| 48hr Down-regulated gene probes (LCA/RCA) (338) |                      |          |              |                   |             |            | 48hr Up-regulated gene probes (LCA/RCA) (250) |                        |          |              |                   |             |            |
|-------------------------------------------------|----------------------|----------|--------------|-------------------|-------------|------------|-----------------------------------------------|------------------------|----------|--------------|-------------------|-------------|------------|
| Gene ID                                         | Gene Name            | Score(d) | Numerator(r) | Denominator(s+s0) | Fold Change | q-value(%) | Gene ID                                       | Gene Name              | Score(d) | Numerator(r) | Denominator(s+s0) | Fold Change | q-value(%) |
| ILMN_2672190                                    | <u>Id1</u>           | 48.65    | 122.48       | 2.52              | 0.45        | 0.00       | ILMN_2743013                                  | <u>Ncf4</u>            | -52.17   | -92.58       | 1.77              | 3.20        | 0.00       |
| ILMN_2588249                                    | <u>S3-12</u>         | 31.40    | 73.58        | 2.34              | 0.38        | 0.00       | ILMN_2939681                                  | <u>Lyzs</u>            | -39.30   | -135.27      | 3.44              | 3.10        | 0.00       |
| ILMN_3113303                                    | <u>Atp2b2</u>        | 29.64    | 181.01       | 6.11              | 0.32        | 0.00       | ILMN_2878071                                  | <u>Lyz</u>             | -24.78   | -302.22      | 12.20             | 3.08        | 0.00       |
| ILMN_2619136                                    | <u>Pthlh</u>         | 28.04    | 145.42       | 5.19              | 0.24        | 0.00       | ILMN_2867147                                  | <u>Tyrobp</u>          | -24.36   | -443.39      | 18.20             | 3.64        | 0.00       |
| ILMN_2687547                                    | <u>Sdpr</u>          | 22.68    | 568.94       | 25.08             | 0.52        | 2.91       | ILMN_2935386                                  | <u>63300548G22Rik</u>  | -22.59   | -112.80      | 4.99              | 1.82        | 3.14       |
| ILMN_2765224                                    | <u>Bcam</u>          | 22.64    | 569.06       | 25.13             | 0.23        | 2.91       | ILMN_1245129                                  | <u>Ifitm1</u>          | -21.94   | -43.43       | 1.98              | 2.14        | 3.14       |
| ILMN_1237224                                    | <u>Kctd12</u>        | 22.01    | 115.55       | 5.25              | 0.46        | 2.91       | ILMN_2767918                                  | <u>Ifi30</u>           | -21.45   | -28.37       | 1.32              | 1.61        | 3.14       |
| ILMN_3037580                                    | <u>Rbms2</u>         | 20.05    | 96.76        | 4.83              | 0.48        | 3.26       | ILMN_3120652                                  | <u>Smao2</u>           | -20.12   | -224.65      | 11.17             | 1.56        | 3.14       |
| ILMN_1228233                                    | <u>Gstm1</u>         | 19.53    | 66.42        | 3.40              | 0.55        | 3.26       | ILMN_2511249                                  | <u>scf0002785.1_4f</u> | -20.10   | -49.58       | 2.47              | 1.64        | 3.14       |
| ILMN_1240938                                    | <u>AW212394</u>      | 19.07    | 279.74       | 14.67             | 0.48        | 3.26       | ILMN_1223257                                  | <u>Ccl4</u>            | -19.59   | -42.79       | 2.18              | 2.41        | 3.14       |
| ILMN_2595664                                    | <u>Dhh</u>           | 19.01    | 621.90       | 32.72             | 0.36        | 3.26       | ILMN_2718801                                  | <u>Fosl2</u>           | -18.65   | -30.83       | 1.65              | 1.71        | 3.40       |
| ILMN_2728539                                    | <u>Exd12</u>         | 17.83    | 30.51        | 1.71              | 0.65        | 3.26       | ILMN_3009860                                  | <u>Sell</u>            | -18.51   | -58.24       | 3.15              | 2.82        | 3.40       |
| ILMN_2630182                                    | <u>Syp</u>           | 16.62    | 42.12        | 2.53              | 0.48        | 3.26       | ILMN_2712986                                  | <u>Chl3l3</u>          | -18.35   | -191.36      | 10.43             | 6.37        | 3.40       |
| ILMN_1222685                                    | <u>1200016G03Rik</u> | 16.40    | 91.80        | 5.60              | 0.46        | 6.00       | ILMN_3127739                                  | <u>Sf3b4</u>           | -16.11   | -82.72       | 5.13              | 1.75        | 7.51       |
| ILMN_1245307                                    | <u>Fbln2</u>         | 16.40    | 53.44        | 3.25              | 0.62        | 6.00       | ILMN_2737713                                  | <u>Efn1</u>            | -15.56   | -444.25      | 28.56             | 2.86        | 7.51       |
| ILMN_2628567                                    | <u>Phlda3</u>        | 15.95    | 22.37        | 1.40              | 0.63        | 6.00       | ILMN_1252076                                  | <u>Lyz2</u>            | -15.32   | -205.83      | 13.44             | 6.70        | 7.51       |
| ILMN_1236168                                    | <u>C030034J23Rik</u> | 15.77    | 190.89       | 12.11             | 0.34        | 6.00       | ILMN_2470131                                  | <u>6720475I19Rik</u>   | -14.90   | -37.43       | 2.51              | 2.11        | 7.51       |
| ILMN_2710159                                    | <u>MGC41689</u>      | 15.70    | 278.76       | 17.75             | 0.35        | 6.00       | ILMN_2888834                                  | <u>Apob48r</u>         | -14.71   | -126.35      | 8.59              | 4.83        | 7.51       |
| ILMN_1253178                                    | <u>Aldh3a1</u>       | 15.41    | 149.83       | 9.72              | 0.40        | 6.00       | ILMN_2920849                                  | <u>Pir4a</u>           | -14.64   | -46.79       | 3.20              | 2.38        | 7.51       |
| ILMN_2576994                                    | <u>C230099G16Rik</u> | 14.88    | 67.10        | 4.51              | 0.66        | 6.00       | ILMN_1240256                                  | <u>Slc9a3r1</u>        | -14.01   | -130.32      | 9.90              | 1.75        | 7.51       |
| ILMN_2697304                                    | <u>Eln</u>           | 14.82    | 934.16       | 63.02             | 0.57        | 6.00       | ILMN_1251066                                  | <u>BC067047</u>        | -13.79   | -42.11       | 3.05              | 1.90        | 7.51       |
| ILMN_2904686                                    | <u>Cyb5f3</u>        | 14.36    | 163.32       | 11.37             | 0.60        | 6.87       | ILMN_3117876                                  | <u>Chl3l3</u>          | -13.67   | -211.31      | 15.45             | 5.78        | 7.51       |
| ILMN_1212935                                    | <u>Fzd4</u>          | 14.35    | 37.25        | 2.60              | 0.66        | 6.87       | ILMN_2714796                                  | <u>Coro1a</u>          | -13.61   | -318.14      | 23.38             | 6.70        | 7.51       |
| ILMN_1258578                                    | <u>Ahnak</u>         | 14.33    | 221.71       | 15.47             | 0.62        | 6.87       | ILMN_1249242                                  | <u>Dnajc2</u>          | -13.27   | -113.51      | 8.55              | 1.59        | 7.51       |
| ILMN_2658804                                    | <u>Rras</u>          | 13.77    | 78.66        | 5.71              | 0.59        | 6.87       | ILMN_1221354                                  | <u>9330156H06Rik</u>   | -13.19   | -18.72       | 1.42              | 1.57        | 8.59       |
| ILMN_2441501                                    | <u>Ctstn1</u>        | 13.77    | 30.38        | 2.21              | 0.62        | 6.87       | ILMN_1225192                                  | <u>Nfkbid</u>          | -12.91   | -65.80       | 5.10              | 3.07        | 8.59       |
| ILMN_2769567                                    | <u>F2r1</u>          | 13.13    | 125.14       | 9.53              | 0.60        | 6.87       | ILMN_2699531                                  | <u>Rgs10</u>           | -12.58   | -71.58       | 5.69              | 1.52        | 8.59       |
| ILMN_1238603                                    | <u>Pcolce2</u>       | 13.11    | 71.99        | 5.49              | 0.48        | 6.87       | ILMN_1217928                                  | <u>C230067006Rik</u>   | -12.58   | -77.27       | 6.14              | 1.80        | 8.59       |
| ILMN_3066763                                    | <u>Ar14a</u>         | 12.46    | 171.95       | 13.80             | 0.38        | 6.87       | ILMN_1217849                                  | <u>Laptm5</u>          | -12.52   | -773.19      | 61.77             | 4.84        | 8.59       |
| ILMN_2557319                                    | <u>D530030K12Rik</u> | 12.34    | 111.85       | 9.06              | 0.63        | 6.87       | ILMN_3013874                                  | <u>EG434858</u>        | -12.45   | -44.72       | 3.59              | 1.77        | 8.59       |
| ILMN_2598103                                    | <u>Emp2</u>          | 12.34    | 656.62       | 53.23             | 0.40        | 6.87       | ILMN_2731760                                  | <u>Myo1f</u>           | -12.09   | -64.59       | 5.34              | 2.76        | 8.59       |
| ILMN_2605539                                    | <u>Sgcd</u>          | 12.12    | 47.08        | 3.88              | 0.52        | 6.87       | ILMN_3089584                                  | <u>Cd74</u>            | -11.69   | -301.56      | 25.80             | 3.80        | 8.59       |
| ILMN_2772855                                    | <u>Plek2</u>         | 12.07    | 45.53        | 3.77              | 0.50        | 6.87       | ILMN_1221817                                  | <u>Cd74</u>            | -11.59   | -223.38      | 19.28             | 3.42        | 8.59       |
| ILMN_2736783                                    | <u>Kctd12</u>        | 12.04    | 380.66       | 31.61             | 0.47        | 6.87       | ILMN_2652511                                  | <u>Hist1h2bj</u>       | -11.44   | -125.50      | 10.97             | 1.62        | 8.59       |
| ILMN_2712873                                    | <u>Cyb5f3</u>        | 12.00    | 101.47       | 8.46              | 0.61        | 6.87       | ILMN_2571683                                  | <u>9830169E20Rik</u>   | -11.43   | -166.80      | 14.59             | 2.12        | 8.59       |
| ILMN_2625920                                    | <u>Aoc3</u>          | 11.95    | 115.86       | 9.69              | 0.30        | 6.87       | ILMN_1259561                                  | <u>Prep</u>            | -11.40   | -40.08       | 3.52              | 1.84        | 8.59       |
| ILMN_3061923                                    | <u>Rbms2</u>         | 11.63    | 89.70        | 7.71              | 0.59        | 6.87       | ILMN_2659151                                  | <u>Thbs1</u>           | -11.34   | -387.28      | 34.15             | 3.36        | 8.59       |
| ILMN_2691641                                    | <u>Gja5</u>          | 11.56    | 678.83       | 58.73             | 0.58        | 6.87       | ILMN_1248139                                  | <u>Gp49a</u>           | -11.16   | -128.29      | 11.49             | 4.54        | 8.59       |
| ILMN_1240266                                    | <u>Ankrd25</u>       | 11.24    | 195.29       | 17.38             | 0.52        | 6.87       | ILMN_1254513                                  | <u>4930553M18Rik</u>   | -11.12   | -178.39      | 16.04             | 2.15        | 8.59       |
| ILMN_2765101                                    | <u>Nkx6-2</u>        | 11.19    | 112.90       | 10.09             | 0.66        | 6.87       | ILMN_2637165                                  | <u>3110001H17Rik</u>   | -11.09   | -72.58       | 6.55              | 1.90        | 8.59       |
| ILMN_2639809                                    | <u>Nucb1</u>         | 11.10    | 78.22        | 7.05              | 0.          |            |                                               |                        |          |              |                   |             |            |

|              |                               |       |        |        |      |      |              |                               |       |          |        |      |      |
|--------------|-------------------------------|-------|--------|--------|------|------|--------------|-------------------------------|-------|----------|--------|------|------|
| ILMN_2502860 | <a href="#">Ern1</a>          | 10.27 | 116.17 | 11.31  | 0.62 | 6.87 | ILMN_2686244 | <a href="#">Rassf4</a>        | -9.81 | -74.07   | 7.55   | 3.21 | 8.67 |
| ILMN_3139103 | <a href="#">Adam15</a>        | 10.24 | 160.88 | 15.71  | 0.34 | 6.87 | ILMN_2609323 | <a href="#">Lst1</a>          | -9.80 | -71.92   | 7.34   | 2.85 | 8.67 |
| ILMN_1215859 | <a href="#">Serpina1b</a>     | 10.20 | 23.75  | 2.33   | 0.59 | 6.87 | ILMN_1226525 | <a href="#">H2-Ab1</a>        | -9.24 | -370.46  | 40.10  | 3.83 | 9.45 |
| ILMN_1213456 | <a href="#">Dhrs7</a>         | 10.10 | 103.87 | 10.29  | 0.50 | 6.87 | ILMN_3102376 | <a href="#">Fcgr2b</a>        | -9.17 | -23.48   | 2.56   | 1.70 | 9.45 |
| ILMN_2725493 | <a href="#">2700078K21Rik</a> | 10.06 | 61.98  | 6.16   | 0.41 | 6.87 | ILMN_1258723 | <a href="#">Bop1</a>          | -9.16 | -36.00   | 3.93   | 1.76 | 9.45 |
| ILMN_2713835 | <a href="#">Nos3</a>          | 10.04 | 149.12 | 14.85  | 0.46 | 6.87 | ILMN_2766780 | <a href="#">Lyzs</a>          | -9.15 | -20.06   | 2.19   | 1.56 | 9.45 |
| ILMN_1214275 | <a href="#">Ddef2</a>         | 9.65  | 43.46  | 4.50   | 0.66 | 7.51 | ILMN_2644587 | <a href="#">Bzw2</a>          | -9.12 | -35.95   | 3.94   | 1.57 | 9.45 |
| ILMN_2596117 | <a href="#">Kctd10</a>        | 9.65  | 190.39 | 19.73  | 0.61 | 7.51 | ILMN_2669404 | <a href="#">Lmbb2</a>         | -8.93 | -294.56  | 33.00  | 1.89 | 9.45 |
| ILMN_2953751 | <a href="#">Sec14l1</a>       | 9.60  | 81.62  | 8.50   | 0.59 | 7.51 | ILMN_2416628 | <a href="#">Pcsd4</a>         | -8.87 | -201.17  | 22.68  | 2.99 | 9.45 |
| ILMN_2715195 | <a href="#">Stxbp3a</a>       | 9.43  | 52.44  | 5.56   | 0.63 | 7.51 | ILMN_2712151 | <a href="#">1810033817Rik</a> | -8.85 | -23.08   | 2.61   | 1.65 | 9.45 |
| ILMN_2801891 | <a href="#">Cymb</a>          | 9.41  | 49.01  | 5.21   | 0.43 | 7.51 | ILMN_1247377 | <a href="#">Mpeg1</a>         | -8.79 | -57.43   | 6.53   | 2.46 | 9.45 |
| ILMN_1236917 | <a href="#">Tmem59</a>        | 9.41  | 88.83  | 9.44   | 0.58 | 7.51 | ILMN_2692960 | <a href="#">Ero1b</a>         | -8.73 | -42.71   | 4.89   | 1.84 | 9.45 |
| ILMN_1224018 | <a href="#">Foxk1</a>         | 9.19  | 58.55  | 6.37   | 0.46 | 7.51 | ILMN_1241302 | <a href="#">Csf3r</a>         | -8.69 | -33.12   | 3.81   | 2.03 | 9.45 |
| ILMN_3022252 | <a href="#">Arhgef15</a>      | 9.15  | 171.08 | 18.69  | 0.60 | 7.51 | ILMN_2606144 | <a href="#">Cd300f</a>        | -8.68 | -221.92  | 25.56  | 7.18 | 9.45 |
| ILMN_2646052 | <a href="#">C4a</a>           | 9.01  | 23.42  | 2.60   | 0.67 | 7.51 | ILMN_2685023 | <a href="#">Hmba1</a>         | -8.65 | -55.09   | 6.37   | 2.72 | 9.45 |
| ILMN_1217742 | <a href="#">Atp2b4</a>        | 8.98  | 190.99 | 21.26  | 0.39 | 7.51 | ILMN_1229530 | <a href="#">Csk</a>           | -8.64 | -97.86   | 11.32  | 1.53 | 9.45 |
| ILMN_1221146 | <a href="#">Cvtl1</a>         | 8.98  | 765.84 | 85.29  | 0.41 | 7.51 | ILMN_2820260 | <a href="#">Wdr77</a>         | -8.59 | -57.58   | 6.71   | 2.07 | 9.45 |
| ILMN_1230578 | <a href="#">LOC100045421</a>  | 8.97  | 34.39  | 3.83   | 0.50 | 7.51 | ILMN_2607880 | <a href="#">Tkt</a>           | -8.53 | -99.97   | 11.72  | 1.67 | 9.45 |
| ILMN_2710274 | <a href="#">Slc9a3r2</a>      | 8.86  | 728.41 | 82.22  | 0.32 | 8.11 | ILMN_2956092 | <a href="#">Rassf4</a>        | -8.48 | -79.40   | 9.36   | 3.33 | 9.45 |
| ILMN_2630039 | <a href="#">E130014J05Rik</a> | 8.77  | 58.00  | 6.61   | 0.58 | 8.11 | ILMN_2909150 | <a href="#">Ctgef</a>         | -8.48 | -1891.21 | 223.12 | 6.00 | 9.45 |
| ILMN_2738345 | <a href="#">Lims2</a>         | 8.64  | 162.65 | 18.82  | 0.40 | 8.11 | ILMN_2687586 | <a href="#">Cxcl16</a>        | -8.46 | -282.89  | 33.45  | 2.20 | 9.45 |
| ILMN_1253182 | <a href="#">Hs3st1</a>        | 8.64  | 64.10  | 7.42   | 0.66 | 8.11 | ILMN_2924831 | <a href="#">Gas7</a>          | -8.44 | -56.56   | 6.70   | 2.08 | 9.45 |
| ILMN_1245446 | <a href="#">5730405J09Rik</a> | 8.63  | 47.55  | 5.51   | 0.63 | 8.11 | ILMN_1238215 | <a href="#">Ctgef</a>         | -8.37 | -755.01  | 90.15  | 7.29 | 9.45 |
| ILMN_2970167 | <a href="#">Wwp2</a>          | 8.52  | 58.26  | 6.83   | 0.61 | 8.11 | ILMN_2685393 | <a href="#">CCR5</a>          | -8.36 | -69.17   | 8.27   | 3.39 | 9.45 |
| ILMN_2942674 | <a href="#">Lims2</a>         | 8.52  | 188.91 | 22.18  | 0.34 | 8.11 | ILMN_2607675 | <a href="#">LOC641240</a>     | -8.35 | -268.72  | 32.18  | 3.29 | 9.45 |
| ILMN_1243080 | <a href="#">Taf9b</a>         | 8.51  | 61.14  | 7.19   | 0.62 | 8.11 | ILMN_2619861 | <a href="#">Nipsnap1</a>      | -8.35 | -48.60   | 5.82   | 1.54 | 9.45 |
| ILMN_1243407 | <a href="#">Klk10</a>         | 8.48  | 840.82 | 99.17  | 0.10 | 8.11 | ILMN_2673776 | <a href="#">Ezf2</a>          | -8.34 | -69.27   | 8.31   | 1.89 | 9.45 |
| ILMN_2416218 | <a href="#">5530400B01Rik</a> | 8.45  | 84.43  | 10.00  | 0.40 | 8.11 | ILMN_2910934 | <a href="#">Cd52</a>          | -8.33 | -214.32  | 25.72  | 5.07 | 9.45 |
| ILMN_2511768 | <a href="#">Ttc17</a>         | 8.40  | 60.34  | 7.18   | 0.60 | 8.11 | ILMN_2694857 | <a href="#">Gpatct3</a>       | -8.33 | -23.57   | 2.83   | 1.53 | 9.45 |
| ILMN_2940642 | <a href="#">St6galnac2</a>    | 8.29  | 199.26 | 24.04  | 0.37 | 8.11 | ILMN_1256883 | <a href="#">Rad51</a>         | -8.23 | -43.04   | 5.23   | 2.15 | 9.45 |
| ILMN_2659879 | <a href="#">Adcy6</a>         | 8.22  | 66.22  | 8.06   | 0.54 | 8.11 | ILMN_2559943 | <a href="#">A230055O06Rik</a> | -8.14 | -56.18   | 6.90   | 2.59 | 9.45 |
| ILMN_2744414 | <a href="#">Nme3</a>          | 8.21  | 50.86  | 6.20   | 0.58 | 8.11 | ILMN_2629971 | <a href="#">Fzr1</a>          | -8.03 | -20.23   | 2.52   | 1.51 | 9.45 |
| ILMN_2778181 | <a href="#">Plekha6</a>       | 8.10  | 47.16  | 5.82   | 0.44 | 8.11 | ILMN_1213364 | <a href="#">LOC638892</a>     | -8.03 | -112.73  | 14.04  | 1.68 | 9.45 |
| ILMN_1213850 | <a href="#">Col4a3</a>        | 8.00  | 394.35 | 49.30  | 0.22 | 8.11 | ILMN_1223317 | <a href="#">Lgals3</a>        | -8.01 | -37.83   | 4.72   | 2.16 | 9.45 |
| ILMN_2638114 | <a href="#">Ptn</a>           | 7.99  | 18.90  | 2.36   | 0.62 | 8.11 | ILMN_2748875 | <a href="#">Fcer1g</a>        | -8.00 | -85.61   | 10.70  | 3.09 | 9.45 |
| ILMN_1225825 | <a href="#">LOC100039175</a>  | 7.99  | 104.11 | 13.03  | 0.49 | 8.11 | ILMN_1235392 | <a href="#">LOC668183</a>     | -7.91 | -76.35   | 9.65   | 2.58 | 9.45 |
| ILMN_1248397 | <a href="#">Smarcd3</a>       | 7.98  | 41.30  | 5.18   | 0.56 | 8.11 | ILMN_1239569 | <a href="#">Lsg1</a>          | -7.89 | -44.59   | 5.65   | 1.64 | 9.45 |
| ILMN_1239381 | <a href="#">Klf3</a>          | 7.96  | 295.85 | 37.19  | 0.35 | 8.11 | ILMN_1230157 | <a href="#">Rnd3</a>          | -7.89 | -113.47  | 14.38  | 2.15 | 9.45 |
| ILMN_2633386 | <a href="#">LOC100044190</a>  | 7.91  | 163.23 | 20.63  | 0.53 | 8.11 | ILMN_2787257 | <a href="#">Coro1a</a>        | -7.86 | -275.12  | 35.02  | 6.06 | 9.45 |
| ILMN_2669602 | <a href="#">Pit6</a>          | 7.87  | 839.18 | 106.64 | 0.27 | 8.11 | ILMN_2781030 | <a href="#">Napsa</a>         | -7.80 | -85.04   | 10.90  | 3.00 | 9.45 |
| ILMN_2479359 | <a href="#">Tmod3</a>         | 7.87  | 67.27  | 8.55   | 0.58 | 8.11 | ILMN_1230440 | <a href="#">1700041B20Rik</a> | -7.79 | -65.43   | 8.40   | 2.16 | 9.45 |
| ILMN_2433213 | <a href="#">Klf7</a>          | 7.87  | 116.57 | 14.82  | 0.59 | 8.11 | ILMN_1252804 | <a href="#">Map4k1</a>        | -7.77 | -26.02   | 3.35   | 1.66 | 9.45 |
| ILMN_1259554 | <a href="#">Marveld1</a>      | 7.86  | 253.40 | 32.24  | 0.48 | 8.11 | ILMN_1236387 | <a href="#">BC024537</a>      | -7.72 | -178.09  | 23.07  | 1.76 | 9.45 |
| ILMN_3094506 | <a href="#">Arhgef15</a>      | 7.78  | 171.53 | 22.04  | 0.54 | 8.11 | ILMN_2887986 | <a href="#">Cd300a</a>        | -7.72 | -252.37  | 32.71  | 4.31 | 9.45 |
| ILMN_2755833 | <a href="#">Lrrc3b</a>        | 7.70  | 26.91  | 3.49   | 0.58 | 8.11 | ILMN_1227434 | <a href="#">Itgb7</a>         | -7.71 | -42.06   | 5.45   | 2.10 | 9.45 |
| ILMN_2723024 | <a href="#">BC004044</a>      | 7.66  | 20.95  | 2.73   | 0.66 | 8.11 | ILMN_2749063 | <a href="#">Dock10</a>        | -7.67 | -63.52   | 8.28   | 2.52 | 9.45 |
| ILMN_1234318 | <a href="#">Ubx1</a>          | 7.65  | 154.31 | 20.18  | 0.60 | 8.11 | ILMN_2460168 | <a href="#">Wdr1</a>          | -7.65 | -71.49   | 9.34   | 1.52 | 9.45 |
| ILMN_2699637 | <a href="#">Lsr</a>           | 7.61  | 175.35 | 23.04  | 0.38 | 8.11 | ILMN_1244123 | <a href="#">Slc38a2</a>       | -7.54 | -275.69  | 36.58  | 1.82 | 9.45 |
| ILMN_2999439 | <a href="#">Klf4</a>          | 7.57  | 230.54 | 30.46  | 0.28 | 8.11 | ILMN_1219712 | <a href="#">Ctsp</a>          | -7.50 | -88.49   | 11.80  | 1.98 | 9.45 |
| ILMN_1231439 | <a href="#">Aat1</a>          | 7.51  | 168.67 | 22.46  | 0.51 | 8.11 | ILMN_1222471 | <a href="#">Gmfj</a>          | -7.49 | -64.19   | 8.57   | 2.23 | 9.45 |
| ILMN_2675760 | <a href="#">2310046K01Rik</a> | 7.49  | 316.15 | 42.21  | 0.33 | 8.11 | ILMN_2816180 | <a href="#">Lbh</a>           | -7.48 | -169.34  | 22.65  | 2.13 | 9.45 |
| ILMN_2661422 | <a href="#">Ramp2</a>         | 7.48  | 563.57 | 75.38  | 0.44 | 8.11 | ILMN_2769285 | <a href="#">Sema6b</a>        | -7.42 | -204.00  | 27.49  | 2.45 | 9.45 |
| ILMN_1248994 | <a href="#">4933407C03Rik</a> | 7.38  | 107.64 | 14.59  | 0.47 | 8.11 | ILMN_2642403 | <a href="#">Lmo4</a>          | -7.40 | -105.47  | 14.25  | 1.70 | 9.45 |
| ILMN_1260405 | <a href="#">D330008E13Rik</a> | 7.36  | 35.13  | 4.77   | 0.65 | 8.11 | ILMN_2657409 | <a href="#">Rps18</a>         | -7.39 | -48.59   | 6.58   | 1.79 | 9.45 |
| ILMN_2675232 | <a href="#">Klk8</a>          | 7.29  | 118.36 | 16.23  | 0.43 | 8.11 | ILMN_3113420 | <a href="#">Ptpn6</a>         | -7.38 | -71.35   | 9.66   | 2.87 | 9.45 |
| ILMN_2608133 | <a href="#">Rhopn2</a>        | 7.29  | 599.12 | 82.24  | 0.26 | 8.11 | ILMN_2656666 | <a href="#">Pstpip1</a>       | -7.34 | -40.93   | 5.58   | 2.26 | 9.45 |
| ILMN_1248740 | <a href="#">Sema3f</a>        | 7.27  | 637.08 | 87.58  | 0.49 | 8.11 | ILMN_2747456 | <a href="#">Ivns1abp</a>      | -7.33 | -546.74  | 74.58  | 4.23 | 9.45 |
| ILMN_2609025 | <a href="#">Elmo1</a>         | 7.21  | 59.82  | 8.30   | 0.66 | 8.11 | ILMN_2690603 | <a href="#">Spp1</a>          | -7.32 | -31.52   | 4.30   | 2.11 | 9.45 |
| ILMN_1230129 | <a href="#">Adamts1</a>       | 7.21  | 71.65  | 9.94   | 0.65 | 8.11 | ILMN_1218123 | <a href="#">Aifi</a>          | -7.28 | -106.31  | 14.60  | 3.00 | 9.45 |
| ILMN_1231802 | <a href="#">Tbc1d9b</a>       | 7.20  | 18.54  | 2.57   | 0.66 | 8.11 | ILMN_2633062 | <a href="#">9130422G05Rik</a> | -7.25 | -25.89   | 3.57   | 1.59 | 9.45 |
| ILMN_2790842 | <a href="#">Jam2</a>          | 7.15  | 151.84 | 21.23  | 0.40 | 8.11 | ILMN_2787785 | <a href="#">Aknk</a>          | -7.23 | -33.42   | 4.62   | 1.75 | 9.45 |
| ILMN_1242787 | <a href="#">4930557M22Rik</a> | 7.13  | 23.00  | 3.22   | 0.64 | 8.11 | ILMN_1224876 | <a href="#">Znhit1</a>        | -7.22 | -60.25   | 8.35   | 1.77 | 9.45 |
| ILMN_1228031 | <a href="#">Dusp8</a>         | 7.13  | 323.32 | 45.34  | 0.27 | 8.11 | ILMN_2685392 | <a href="#">Ccr5</a>          | -7.21 | -59.36   | 8.23   | 2.87 | 9.45 |
| ILMN_1224589 | <a href="#">Tmem77</a>        | 7.11  | 35.33  | 4.97   | 0.65 | 8.11 | ILMN_1255766 | <a href="#">Sh3bp2</a>        | -7.20 | -146.71  | 20.37  | 1.96 | 9.45 |
| ILMN_2485594 | <a href="#">B130005J07Rik</a> | 7.10  | 20.17  | 2.84   | 0.65 | 8.11 | ILMN_2524817 | <a href="#">Dnahc17</a>       | -7.14 | -40.68   | 5.70   | 1.82 | 9.45 |
| ILMN_1237264 | <a href="#">Trspap1</a>       | 7.10  | 37.17  | 5.23   | 0.59 | 8.11 | ILMN_1228657 | <a href="#">Fcgr2b</a>        | -7.12 | -25.28   | 3.55   | 1.77 | 9.45 |
| ILMN_2678355 | <a href="#">Amigo2</a>        | 7.10  | 226.95 | 31.98  | 0.44 | 8.11 | ILMN_2628629 | <a href="#">Cdh1</a>          | -7.03 | -24.99   | 3.56   | 1.58 | 9.45 |
| ILMN_1218934 | <a href="#">Rdm1</a>          | 7.05  | 64.87  | 9.20   | 0.54 | 8.11 | ILMN_2671984 | <a href="#">Ptpcr</a>         | -7.01 | -60.84   | 8.67   | 2.59 | 9.45 |
| ILMN_2777082 | <a href="#">P4ha2</a>         | 7.01  | 468.20 | 66.75  | 0.40 | 8.11 | ILMN_2619961 | <a href="#">4933429F08Rik</a> | -6.99 | -22.30   | 3.19   | 1.61 | 9.45 |
| ILMN_2430542 | <a href="#">Nos3</a>          | 6.94  | 136.32 | 19.64  | 0.46 | 8.11 | ILMN_2663930 | <a href="#">Sfnf1</a>         | -6.95 | -144.45  | 20.79  | 5.35 | 9.45 |
| ILMN_3003864 | <a href="#">Cgnt1</a>         | 6.93  | 320.81 | 46.26  | 0.39 | 8.11 | ILMN_2675223 | <a href="#">Cd33</a>          | -6.91 | -77.32   | 11.18  |      |      |

|               |                               |      |         |        |      |      |              |                                |       |          |        |      |      |
|---------------|-------------------------------|------|---------|--------|------|------|--------------|--------------------------------|-------|----------|--------|------|------|
| ILMN_1228245  | <a href="#">Prickle1</a>      | 6.46 | 27.93   | 4.32   | 0.64 | 8.11 | ILMN_1221736 | <a href="#">Samhd1</a>         | -6.31 | -108.70  | 17.22  | 2.13 | 9.45 |
| ILMN_3137804  | <a href="#">Pbx1</a>          | 6.41 | 40.53   | 6.32   | 0.63 | 8.11 | ILMN_2634248 | <a href="#">Synchron</a>       | -6.31 | -80.52   | 12.76  | 1.71 | 9.45 |
| ILMN_2618408  | <a href="#">Icam2</a>         | 6.38 | 476.29  | 74.65  | 0.48 | 8.11 | ILMN_2957167 | <a href="#">4931417G12Rik</a>  | -6.30 | -27.27   | 4.33   | 1.68 | 9.45 |
| ILMN_1249888  | <a href="#">Adcy6</a>         | 6.36 | 80.57   | 12.66  | 0.62 | 8.11 | ILMN_2963974 | <a href="#">Gemin4</a>         | -6.30 | -34.03   | 5.40   | 1.63 | 9.45 |
| ILMN_1215879  | <a href="#">Pkh1l1</a>        | 6.36 | 31.44   | 4.94   | 0.40 | 8.11 | ILMN_2742152 | <a href="#">Gadd45a</a>        | -6.28 | -138.42  | 22.03  | 4.87 | 9.45 |
| ILMN_1218241  | <a href="#">Slc9a3r2</a>      | 6.35 | 33.07   | 5.20   | 0.55 | 8.11 | ILMN_1219333 | <a href="#">9830134K01Rik</a>  | -6.28 | -25.26   | 4.02   | 1.61 | 9.45 |
| ILMN_3049559  | <a href="#">C4b</a>           | 6.34 | 65.15   | 10.28  | 0.54 | 8.11 | ILMN_3157568 | <a href="#">Bcl2l1l</a>        | -6.28 | -59.58   | 9.49   | 1.84 | 9.45 |
| ILMN_1255416  | <a href="#">Ly6a</a>          | 6.30 | 685.75  | 108.79 | 0.53 | 8.11 | ILMN_2601155 | <a href="#">Frbz</a>           | -6.28 | -70.68   | 11.26  | 2.01 | 9.45 |
| ILMN_1257193  | <a href="#">Ppm1a</a>         | 6.30 | 47.33   | 7.51   | 0.64 | 8.11 | ILMN_2529254 | <a href="#">LOC223653</a>      | -6.25 | -26.41   | 4.23   | 1.64 | 9.45 |
| ILMN_1241605  | <a href="#">LOC383884</a>     | 6.30 | 20.62   | 3.27   | 0.64 | 8.11 | ILMN_1249486 | <a href="#">Mgl1</a>           | -6.21 | -295.82  | 47.66  | 4.25 | 9.45 |
| ILMN_2700166  | <a href="#">Cnd2</a>          | 6.30 | 165.71  | 26.30  | 0.63 | 8.11 | ILMN_2894211 | <a href="#">8430408G22Rik</a>  | -6.18 | -32.44   | 5.25   | 2.00 | 9.45 |
| ILMN_1225657  | <a href="#">2410095820Rik</a> | 6.30 | 27.46   | 4.36   | 0.63 | 8.11 | ILMN_2896805 | <a href="#">Psmid12</a>        | -6.17 | -62.78   | 10.17  | 1.57 | 9.45 |
| ILMN_2896843  | <a href="#">Cd248</a>         | 6.29 | 45.73   | 7.27   | 0.49 | 8.11 | ILMN_2906473 | <a href="#">Gbi</a>            | -6.17 | -88.64   | 14.36  | 1.53 | 9.45 |
| ILMN_2513922  | <a href="#">Pdm16</a>         | 6.27 | 25.09   | 4.00   | 0.63 | 8.11 | ILMN_2821148 | <a href="#">Serhl</a>          | -6.12 | -96.50   | 15.77  | 2.29 | 9.45 |
| ILMN_2614380  | <a href="#">Map3k1</a>        | 6.25 | 141.98  | 22.72  | 0.60 | 8.11 | ILMN_2685194 | <a href="#">Lass6</a>          | -6.10 | -44.65   | 7.32   | 2.43 | 9.45 |
| ILMN_1248895  | <a href="#">Cachd1</a>        | 6.21 | 24.29   | 3.91   | 0.60 | 8.11 | ILMN_3139875 | <a href="#">Aco1l</a>          | -6.09 | -46.77   | 7.67   | 1.79 | 9.45 |
| ILMN_1260571  | <a href="#">Spsa2</a>         | 6.18 | 81.47   | 13.18  | 0.65 | 8.11 | ILMN_1254577 | <a href="#">Al607873</a>       | -6.07 | -63.12   | 10.39  | 2.81 | 9.45 |
| ILMN_2640570  | <a href="#">Pak4</a>          | 6.12 | 267.69  | 43.75  | 0.42 | 8.11 | ILMN_2526163 | <a href="#">OC380753</a>       | -6.07 | -23.63   | 3.90   | 1.61 | 9.45 |
| ILMN_1243249  | <a href="#">2810410A03Rik</a> | 6.08 | 242.39  | 39.89  | 0.51 | 8.11 | ILMN_2593496 | <a href="#">Got2</a>           | -6.05 | -127.90  | 21.14  | 1.62 | 9.45 |
| ILMN_2733887  | <a href="#">Mknk2</a>         | 6.06 | 230.14  | 37.96  | 0.43 | 8.11 | ILMN_2618714 | <a href="#">Pdgrfb</a>         | -6.00 | -192.47  | 32.06  | 3.27 | 9.45 |
| ILMN_1239673  | <a href="#">LOC672215</a>     | 6.04 | 41.20   | 6.82   | 0.53 | 8.11 | ILMN_1255419 | <a href="#">Zfpn1a1</a>        | -5.99 | -32.61   | 5.44   | 2.04 | 9.45 |
| ILMN_2963704  | <a href="#">Sfnx3</a>         | 6.01 | 410.52  | 68.36  | 0.66 | 8.11 | ILMN_1259488 | <a href="#">Mgea6</a>          | -5.93 | -86.89   | 14.66  | 1.78 | 9.45 |
| ILMN_2513570  | <a href="#">AW123240</a>      | 5.99 | 48.15   | 8.04   | 0.64 | 8.11 | ILMN_2836137 | <a href="#">E2f2</a>           | -5.89 | -70.10   | 11.90  | 1.96 | 9.45 |
| ILMN_2670375  | <a href="#">Irm2b</a>         | 5.98 | 254.84  | 42.59  | 0.64 | 8.11 | ILMN_2734729 | <a href="#">H2-Aa</a>          | -5.89 | -60.77   | 10.32  | 2.27 | 9.45 |
| ILMN_1219447  | <a href="#">Zmym3</a>         | 5.97 | 77.53   | 12.98  | 0.57 | 8.11 | ILMN_2742592 | <a href="#">Hist1h2be</a>      | -5.87 | -169.99  | 28.97  | 1.74 | 9.45 |
| ILMN_2761918  | <a href="#">Mmnm2</a>         | 5.96 | 506.28  | 84.98  | 0.54 | 8.11 | ILMN_1254035 | <a href="#">Myo10</a>          | -5.84 | -31.72   | 5.43   | 2.00 | 9.45 |
| ILMN_2789562  | <a href="#">P4ha2</a>         | 5.95 | 219.30  | 36.88  | 0.41 | 8.11 | ILMN_1256359 | <a href="#">Smox</a>           | -5.82 | -23.62   | 4.06   | 1.72 | 9.45 |
| ILMN_2493521  | <a href="#">Trnc6c</a>        | 5.94 | 52.82   | 8.89   | 0.62 | 8.11 | ILMN_1262606 | <a href="#">Tmem132a</a>       | -5.81 | -127.84  | 22.01  | 1.54 | 9.45 |
| ILMN_2728538  | <a href="#">Exdl2</a>         | 5.93 | 29.64   | 5.00   | 0.63 | 8.11 | ILMN_1247832 | <a href="#">Cd74</a>           | -5.80 | -67.15   | 11.57  | 2.67 | 9.45 |
| ILMN_2658407  | <a href="#">Elmo1</a>         | 5.91 | 52.73   | 8.92   | 0.62 | 8.11 | ILMN_2704919 | <a href="#">Ube2t</a>          | -5.79 | -19.63   | 3.39   | 1.64 | 9.45 |
| ILMN_1223049  | <a href="#">Tns1</a>          | 5.89 | 137.96  | 23.43  | 0.49 | 8.11 | ILMN_2494707 | <a href="#">OC381232</a>       | -5.73 | -15.62   | 2.73   | 1.50 | 9.45 |
| ILMN_2855515  | <a href="#">Pnplg6</a>        | 5.86 | 69.34   | 11.82  | 0.62 | 8.11 | ILMN_2727663 | <a href="#">Tgfb</a>           | -5.69 | -61.32   | 10.78  | 2.82 | 9.45 |
| ILMN_2913222  | <a href="#">Efcabada</a>      | 5.84 | 136.41  | 23.35  | 0.50 | 8.11 | ILMN_2435584 | <a href="#">scf0001978.1_6</a> | -5.67 | -196.97  | 34.71  | 1.83 | 9.45 |
| ILMN_2577853  | <a href="#">Rw1-pending</a>   | 5.82 | 29.72   | 5.11   | 0.63 | 8.11 | ILMN_1214071 | <a href="#">Ifft1</a>          | -5.66 | -211.63  | 37.41  | 4.60 | 9.45 |
| ILMN_1224866  | <a href="#">Ptgs1</a>         | 5.80 | 45.80   | 7.90   | 0.51 | 8.36 | ILMN_2552295 | <a href="#">Vcam1</a>          | -5.65 | -34.00   | 6.01   | 1.53 | 9.45 |
| ILMN_2933431  | <a href="#">Pps</a>           | 5.78 | 25.83   | 4.47   | 0.62 | 8.36 | ILMN_2814974 | <a href="#">Klra2</a>          | -5.64 | -72.50   | 12.85  | 3.25 | 9.45 |
| ILMN_2750053  | <a href="#">Ptprj</a>         | 5.78 | 573.00  | 99.14  | 0.33 | 8.36 | ILMN_2922899 | <a href="#">Pibcb2</a>         | -5.64 | -21.05   | 3.73   | 1.57 | 9.45 |
| ILMN_2641228  | <a href="#">Hspa12b</a>       | 5.77 | 267.94  | 46.45  | 0.46 | 8.36 | ILMN_1247540 | <a href="#">Vcan</a>           | -5.64 | -21.42   | 3.80   | 1.62 | 9.45 |
| ILMN_2947526  | <a href="#">Ecm1</a>          | 5.76 | 102.54  | 17.79  | 0.55 | 8.36 | ILMN_2810405 | <a href="#">Myo1g</a>          | -5.64 | -80.61   | 14.30  | 3.19 | 9.45 |
| ILMN_2757019  | <a href="#">She</a>           | 5.72 | 105.35  | 18.41  | 0.66 | 8.36 | ILMN_2655336 | <a href="#">Vcan</a>           | -5.61 | -56.36   | 10.05  | 2.22 | 9.45 |
| ILMN_2509327  | <a href="#">Wipf3</a>         | 5.71 | 25.26   | 4.42   | 0.60 | 8.36 | ILMN_1231012 | <a href="#">Lcp2</a>           | -5.60 | -24.11   | 4.31   | 1.74 | 9.45 |
| ILMN_2633897  | <a href="#">Pde6d</a>         | 5.70 | 29.69   | 5.20   | 0.64 | 8.36 | ILMN_2915232 | <a href="#">Cotl1</a>          | -5.58 | -147.47  | 26.41  | 3.69 | 9.45 |
| ILMN_2615035  | <a href="#">Mgst3</a>         | 5.70 | 156.45  | 27.43  | 0.56 | 8.36 | ILMN_1222059 | <a href="#">Thbs1</a>          | -5.58 | -1097.52 | 196.84 | 3.77 | 9.45 |
| ILMN_3126277  | <a href="#">Palmd</a>         | 5.70 | 375.82  | 65.94  | 0.58 | 8.36 | ILMN_2936380 | <a href="#">Sgpl1</a>          | -5.56 | -27.63   | 4.97   | 1.59 | 9.45 |
| ILMN_2743320  | <a href="#">Myst4</a>         | 5.66 | 35.97   | 6.35   | 0.63 | 8.36 | ILMN_2585233 | <a href="#">Selpl</a>          | -5.56 | -20.65   | 3.71   | 1.57 | 9.45 |
| ILMN_2592823  | <a href="#">Cdc42ep5</a>      | 5.65 | 46.78   | 8.28   | 0.60 | 8.36 | ILMN_1242661 | <a href="#">Itgb2</a>          | -5.50 | -38.79   | 7.06   | 1.89 | 9.45 |
| ILMN_1241293  | <a href="#">Cldn5</a>         | 5.64 | 905.91  | 160.54 | 0.39 | 8.36 | ILMN_3072427 | <a href="#">Iltm</a>           | -5.49 | -26.03   | 4.74   | 1.67 | 9.45 |
| ILMN_2727687  | <a href="#">Numb</a>          | 5.64 | 40.69   | 7.21   | 0.63 | 8.36 | ILMN_2577664 | <a href="#">Fcgr2b</a>         | -5.48 | -38.40   | 7.00   | 2.12 | 9.45 |
| ILMN_3111877  | <a href="#">Rbms2</a>         | 5.62 | 204.42  | 36.35  | 0.62 | 8.36 | ILMN_2715234 | <a href="#">Rnmt1l</a>         | -5.45 | -40.18   | 7.37   | 1.75 | 9.45 |
| ILMN_2727309  | <a href="#">LOC100044204</a>  | 5.60 | 98.74   | 17.62  | 0.40 | 8.36 | ILMN_3043669 | <a href="#">Sla</a>            | -5.44 | -29.67   | 5.45   | 1.77 | 9.45 |
| ILMN_3159275  | <a href="#">Ahnak</a>         | 5.60 | 146.55  | 26.17  | 0.62 | 8.36 | ILMN_2957862 | <a href="#">Noc4l</a>          | -5.42 | -105.05  | 19.37  | 1.71 | 9.45 |
| ILMN_2877069  | <a href="#">Tspo</a>          | 5.60 | 108.53  | 19.38  | 0.60 | 8.36 | ILMN_1222803 | <a href="#">Hspa9</a>          | -5.41 | -121.18  | 22.38  | 1.65 | 9.45 |
| ILMN_2678477  | <a href="#">Gja5</a>          | 5.60 | 81.70   | 14.60  | 0.44 | 8.36 | ILMN_2547840 | <a href="#">220005K02Rik</a>   | -5.39 | -96.34   | 17.86  | 2.08 | 9.45 |
| ILMN_3052632  | <a href="#">Epas1</a>         | 5.59 | 1006.29 | 179.97 | 0.50 | 8.36 | ILMN_1227907 | <a href="#">Gmfg</a>           | -5.39 | -97.65   | 18.13  | 2.59 | 9.45 |
| ILMN_2592881  | <a href="#">Jam2</a>          | 5.58 | 56.34   | 10.10  | 0.53 | 8.36 | ILMN_1242457 | <a href="#">Fpr2</a>           | -5.37 | -102.16  | 19.04  | 4.03 | 9.45 |
| ILMN_3132223  | <a href="#">C630004H02Rik</a> | 5.55 | 98.03   | 17.66  | 0.61 | 8.36 | ILMN_2752224 | <a href="#">Mrps28</a>         | -5.35 | -36.40   | 6.80   | 5.59 | 9.45 |
| ILMN_2466164  | <a href="#">Wfdc1</a>         | 5.54 | 36.49   | 6.59   | 0.48 | 8.36 | ILMN_2657478 | <a href="#">Cd53</a>           | -5.33 | -45.50   | 8.53   | 2.30 | 9.45 |
| ILMN_3115796  | <a href="#">Cd40</a>          | 5.54 | 63.12   | 11.40  | 0.43 | 8.36 | ILMN_1249498 | <a href="#">Plek</a>           | -5.27 | -34.74   | 6.59   | 1.95 | 9.45 |
| ILMN_27120083 | <a href="#">Bace2</a>         | 5.54 | 155.25  | 28.05  | 0.44 | 8.36 | ILMN_1251669 | <a href="#">Evi2a</a>          | -5.26 | -72.52   | 13.79  | 2.87 | 9.45 |
| ILMN_2705128  | <a href="#">Muted</a>         | 5.53 | 212.07  | 38.32  | 0.65 | 8.36 | ILMN_1220418 | <a href="#">Hcst</a>           | -5.25 | -81.31   | 15.48  | 3.13 | 9.45 |
| ILMN_1220234  | <a href="#">Serpin1e</a>      | 5.52 | 64.66   | 11.71  | 0.37 | 8.36 | ILMN_2746501 | <a href="#">Csfr</a>           | -5.23 | -31.19   | 5.97   | 1.93 | 9.45 |
| ILMN_2599008  | <a href="#">Kirrel3</a>       | 5.51 | 37.01   | 6.71   | 0.53 | 8.36 | ILMN_2859847 | <a href="#">Pygl</a>           | -5.21 | -26.85   | 5.15   | 1.71 | 9.45 |
| ILMN_2588295  | <a href="#">Rarres2</a>       | 5.48 | 47.39   | 8.64   | 0.46 | 8.36 | ILMN_2666487 | <a href="#">Ruvbl1</a>         | -5.21 | -59.50   | 11.42  | 2.08 | 9.45 |
| ILMN_2881681  | <a href="#">Trnc6c</a>        | 5.47 | 157.45  | 28.76  | 0.47 | 8.36 | ILMN_2745425 | <a href="#">Rcc1</a>           | -5.14 | -123.41  | 24.01  | 1.51 | 9.45 |
| ILMN_2865335  | <a href="#">Krt80</a>         | 5.46 | 205.30  | 37.58  | 0.47 | 8.36 | ILMN_1248604 | <a href="#">D030029G14Rik</a>  | -5.12 | -26.35   | 5.14   | 1.62 | 9.45 |
| ILMN_2432550  | <a href="#">Trib2</a>         | 5.46 | 148.79  | 27.26  | 0.36 | 8.36 | ILMN_2485839 | <a href="#">Trnfrs1b</a>       | -5.12 | -48.65   | 9.50   | 1.75 | 9.45 |
| ILMN_2756665  | <a href="#">Cbr2</a>          | 5.46 | 96.44   | 17.68  | 0.42 | 8.36 | ILMN_3155245 | <a href="#">Arhgap25</a>       | -5.10 | -67.34   | 13.20  | 1.76 | 9.45 |
| ILMN_2736379  | <a href="#">Nfia</a>          | 5.45 | 164.72  | 30.21  | 0.65 | 8.36 | ILMN_2495068 | <a href="#">scf000854.1_75</a> | -5.09 | -39.51   | 7.76   | 1.82 | 9.45 |
| ILMN_2572849  | <a href="#">C920007D24Rik</a> | 5.44 | 46.49   | 8.54   | 0.53 | 8.36 | ILMN_2720634 | <a href="#">Prmt5</a>          | -5.08 | -67.20   | 13.22  | 1.84 | 9.45 |
| ILMN_1225988  | <a href="#">Zdhc3</a>         | 5.44 | 49.76   | 9.15   | 0.44 | 8.36 | ILMN_2653619 | <a href="#">Ctag5</a>          | -5.03 | -99.04   | 19.69  | 1.70 | 9.45 |
| ILMN_2862179  | <a href="#">Ccl11</a>         | 5.44 | 18.10   | 3.33   | 0.64 | 8.36 | ILMN_2637714 | <a href="#">Rasa3</a>          | -5.02 | -154.22  | 30.73  | 1.96 | 9.45 |
| ILMN_1257077  | <a href="#">Jag</a>           |      |         |        |      |      |              |                                |       |          |        |      |      |

|              |                               |      |         |        |      |      |              |                          |       |         |       |      |      |
|--------------|-------------------------------|------|---------|--------|------|------|--------------|--------------------------|-------|---------|-------|------|------|
| ILMN_1238936 | <a href="#">D130063P19Rik</a> | 5.02 | 29.32   | 5.84   | 0.61 | 8.65 | ILMN_2633275 | <a href="#">Golt1b</a>   | -4.70 | -20.69  | 4.41  | 1.52 | 9.92 |
| ILMN_3112526 | <a href="#">Ldb2</a>          | 5.02 | 75.50   | 15.04  | 0.49 | 8.65 | ILMN_1257019 | <a href="#">BC037034</a> | -4.69 | -178.07 | 37.97 | 1.66 | 9.92 |
| ILMN_1233340 | <a href="#">Pkp4</a>          | 5.00 | 332.80  | 66.59  | 0.64 | 8.65 | ILMN_2507890 | <a href="#">Ddx27</a>    | -4.66 | -59.63  | 12.79 | 1.79 | 9.92 |
| ILMN_2454786 | <a href="#">Tpcn1</a>         | 4.99 | 92.71   | 18.58  | 0.52 | 8.65 |              |                          |       |         |       |      |      |
| ILMN_3163020 | <a href="#">Klc1</a>          | 4.98 | 54.81   | 11.01  | 0.66 | 8.65 |              |                          |       |         |       |      |      |
| ILMN_1232123 | <a href="#">Traf3ip2</a>      | 4.97 | 33.68   | 6.77   | 0.60 | 8.65 |              |                          |       |         |       |      |      |
| ILMN_1231520 | <a href="#">Trpv4</a>         | 4.97 | 66.51   | 13.39  | 0.51 | 8.65 |              |                          |       |         |       |      |      |
| ILMN_2449620 | <a href="#">S830427D02Rik</a> | 4.96 | 23.51   | 4.74   | 0.61 | 8.65 |              |                          |       |         |       |      |      |
| ILMN_2740628 | <a href="#">Ndr3</a>          | 4.95 | 28.58   | 5.78   | 0.58 | 8.65 |              |                          |       |         |       |      |      |
| ILMN_2931918 | <a href="#">4432416J03Rik</a> | 4.95 | 29.33   | 5.93   | 0.56 | 8.65 |              |                          |       |         |       |      |      |
| ILMN_2834370 | <a href="#">Cutc</a>          | 4.94 | 67.50   | 13.65  | 0.63 | 8.65 |              |                          |       |         |       |      |      |
| ILMN_2610442 | <a href="#">Wscd1</a>         | 4.91 | 90.57   | 18.44  | 0.56 | 8.65 |              |                          |       |         |       |      |      |
| ILMN_2663211 | <a href="#">Stbd1</a>         | 4.88 | 61.45   | 12.58  | 0.58 | 8.65 |              |                          |       |         |       |      |      |
| ILMN_2688236 | <a href="#">Atp2a3</a>        | 4.87 | 1787.36 | 366.78 | 0.63 | 8.65 |              |                          |       |         |       |      |      |
| ILMN_1212703 | <a href="#">Kras</a>          | 4.87 | 110.37  | 22.66  | 0.63 | 8.65 |              |                          |       |         |       |      |      |
| ILMN_2870522 | <a href="#">Plekha6</a>       | 4.86 | 249.03  | 51.28  | 0.20 | 8.65 |              |                          |       |         |       |      |      |
| ILMN_2790839 | <a href="#">Jam2</a>          | 4.85 | 246.15  | 50.75  | 0.40 | 8.65 |              |                          |       |         |       |      |      |
| ILMN_2621038 | <a href="#">Hoxa7</a>         | 4.84 | 33.50   | 6.92   | 0.64 | 8.65 |              |                          |       |         |       |      |      |
| ILMN_2745367 | <a href="#">Myo1c</a>         | 4.84 | 54.10   | 11.18  | 0.64 | 8.65 |              |                          |       |         |       |      |      |
| ILMN_1253304 | <a href="#">Stmn2</a>         | 4.81 | 137.74  | 28.63  | 0.27 | 9.10 |              |                          |       |         |       |      |      |
| ILMN_2473692 | <a href="#">1110059G02Rik</a> | 4.81 | 31.28   | 6.51   | 0.64 | 9.10 |              |                          |       |         |       |      |      |
| ILMN_2923607 | <a href="#">Phlda3</a>        | 4.80 | 107.05  | 22.30  | 0.54 | 9.10 |              |                          |       |         |       |      |      |
| ILMN_1238331 | <a href="#">Rom1</a>          | 4.79 | 154.73  | 32.29  | 0.46 | 9.10 |              |                          |       |         |       |      |      |
| ILMN_1250469 | <a href="#">Bcl9l</a>         | 4.78 | 650.33  | 136.03 | 0.46 | 9.10 |              |                          |       |         |       |      |      |
| ILMN_2507400 | <a href="#">9330180L10Rik</a> | 4.77 | 53.34   | 11.19  | 0.62 | 9.10 |              |                          |       |         |       |      |      |
| ILMN_3161897 | <a href="#">Dync1l2</a>       | 4.76 | 80.60   | 16.93  | 0.62 | 9.10 |              |                          |       |         |       |      |      |
| ILMN_2686087 | <a href="#">Cutc</a>          | 4.74 | 50.46   | 10.64  | 0.55 | 9.10 |              |                          |       |         |       |      |      |
| ILMN_1229828 | <a href="#">Adamts10</a>      | 4.72 | 32.02   | 6.79   | 0.57 | 9.10 |              |                          |       |         |       |      |      |
| ILMN_2700408 | <a href="#">Mgl1</a>          | 4.71 | 45.83   | 9.72   | 0.46 | 9.10 |              |                          |       |         |       |      |      |
| ILMN_2624451 | <a href="#">4933407C03Rik</a> | 4.71 | 193.57  | 41.08  | 0.45 | 9.10 |              |                          |       |         |       |      |      |
| ILMN_2474515 | <a href="#">9430020K01Rik</a> | 4.68 | 42.93   | 9.17   | 0.66 | 9.10 |              |                          |       |         |       |      |      |
| ILMN_1259753 | <a href="#">Sp4</a>           | 4.67 | 31.44   | 6.73   | 0.59 | 9.10 |              |                          |       |         |       |      |      |
| ILMN_2727481 | <a href="#">Palmd</a>         | 4.66 | 261.30  | 56.11  | 0.57 | 9.10 |              |                          |       |         |       |      |      |
| ILMN_2597769 | <a href="#">Igf2</a>          | 4.65 | 190.26  | 40.93  | 0.29 | 9.10 |              |                          |       |         |       |      |      |
| ILMN_2697760 | <a href="#">Nkx2-3</a>        | 4.65 | 63.00   | 13.56  | 0.58 | 9.10 |              |                          |       |         |       |      |      |
| ILMN_2622354 | <a href="#">Arf4</a>          | 4.65 | 30.19   | 6.50   | 0.57 | 9.10 |              |                          |       |         |       |      |      |
| ILMN_2838317 | <a href="#">Pqlc3</a>         | 4.63 | 32.01   | 6.91   | 0.55 | 9.10 |              |                          |       |         |       |      |      |
| ILMN_2604029 | <a href="#">Klf2</a>          | 4.62 | 118.69  | 25.69  | 0.27 | 9.10 |              |                          |       |         |       |      |      |
| ILMN_1246346 | <a href="#">8230107H12Rik</a> | 4.62 | 37.68   | 8.16   | 0.63 | 9.10 |              |                          |       |         |       |      |      |
| ILMN_1222365 | <a href="#">2610200O14Rik</a> | 4.61 | 34.86   | 7.56   | 0.62 | 9.10 |              |                          |       |         |       |      |      |
| ILMN_1251524 | <a href="#">Them4</a>         | 4.58 | 27.08   | 5.91   | 0.66 | 9.10 |              |                          |       |         |       |      |      |
| ILMN_2993109 | <a href="#">Ddit4</a>         | 4.58 | 343.37  | 75.01  | 0.63 | 9.10 |              |                          |       |         |       |      |      |
| ILMN_2646166 | <a href="#">Ndr1</a>          | 4.57 | 110.74  | 24.23  | 0.64 | 9.10 |              |                          |       |         |       |      |      |
| ILMN_2729153 | <a href="#">Nos3</a>          | 4.56 | 129.94  | 28.49  | 0.45 | 9.45 |              |                          |       |         |       |      |      |
| ILMN_1237671 | <a href="#">Setmar</a>        | 4.56 | 43.57   | 9.56   | 0.50 | 9.45 |              |                          |       |         |       |      |      |
| ILMN_2634689 | <a href="#">Itgb4</a>         | 4.55 | 122.74  | 26.97  | 0.40 | 9.45 |              |                          |       |         |       |      |      |
| ILMN_1217061 | <a href="#">Casp9</a>         | 4.54 | 95.47   | 21.03  | 0.64 | 9.45 |              |                          |       |         |       |      |      |
| ILMN_2833781 | <a href="#">Pwwp2b</a>        | 4.54 | 76.92   | 16.96  | 0.52 | 9.45 |              |                          |       |         |       |      |      |
| ILMN_2857957 | <a href="#">Mgl1</a>          | 4.53 | 41.95   | 9.26   | 0.48 | 9.45 |              |                          |       |         |       |      |      |
| ILMN_1232928 | <a href="#">Tim3</a>          | 4.52 | 366.95  | 81.19  | 0.55 | 9.45 |              |                          |       |         |       |      |      |
| ILMN_2622500 | <a href="#">Zbtb7c</a>        | 4.52 | 209.94  | 46.49  | 0.19 | 9.45 |              |                          |       |         |       |      |      |
| ILMN_1249637 | <a href="#">Peg13</a>         | 4.51 | 25.91   | 5.75   | 0.64 | 9.45 |              |                          |       |         |       |      |      |
| ILMN_2765047 | <a href="#">Chrd</a>          | 4.50 | 62.48   | 13.88  | 0.37 | 9.45 |              |                          |       |         |       |      |      |
| ILMN_1217606 | <a href="#">1500005K14Rik</a> | 4.50 | 75.17   | 16.71  | 0.39 | 9.45 |              |                          |       |         |       |      |      |
| ILMN_2683095 | <a href="#">Ap1g2</a>         | 4.48 | 89.31   | 19.91  | 0.67 | 9.45 |              |                          |       |         |       |      |      |
| ILMN_2498731 | <a href="#">E030024M20Rik</a> | 4.48 | 198.90  | 44.37  | 0.33 | 9.45 |              |                          |       |         |       |      |      |
| ILMN_1232295 | <a href="#">Sort1</a>         | 4.47 | 75.52   | 16.89  | 0.66 | 9.45 |              |                          |       |         |       |      |      |
| ILMN_2614889 | <a href="#">B3gnt8</a>        | 4.46 | 250.68  | 56.27  | 0.28 | 9.45 |              |                          |       |         |       |      |      |
| ILMN_2602185 | <a href="#">9/9/2009</a>      | 4.44 | 141.84  | 31.92  | 0.50 | 9.45 |              |                          |       |         |       |      |      |
| ILMN_2661299 | <a href="#">Pmp22</a>         | 4.44 | 20.82   | 4.68   | 0.66 | 9.45 |              |                          |       |         |       |      |      |
| ILMN_2504268 | <a href="#">Gcap26</a>        | 4.40 | 113.00  | 25.68  | 0.24 | 9.45 |              |                          |       |         |       |      |      |
| ILMN_2620233 | <a href="#">Fmo5</a>          | 4.38 | 28.06   | 6.41   | 0.57 | 9.45 |              |                          |       |         |       |      |      |
| ILMN_2876579 | <a href="#">Ubx1</a>          | 4.37 | 94.21   | 21.57  | 0.57 | 9.45 |              |                          |       |         |       |      |      |
| ILMN_3144575 | <a href="#">Itgb4</a>         | 4.36 | 182.41  | 41.81  | 0.43 | 9.45 |              |                          |       |         |       |      |      |
| ILMN_2755424 | <a href="#">Bcor1</a>         | 4.36 | 50.23   | 11.52  | 0.60 | 9.45 |              |                          |       |         |       |      |      |
| ILMN_2880906 | <a href="#">Pdlim2</a>        | 4.36 | 201.44  | 46.22  | 0.29 | 9.45 |              |                          |       |         |       |      |      |
| ILMN_2798993 | <a href="#">Nr1d2</a>         | 4.35 | 76.58   | 17.59  | 0.66 | 9.45 |              |                          |       |         |       |      |      |
| ILMN_2702547 | <a href="#">4930519N16Rik</a> | 4.34 | 48.97   | 11.29  | 0.40 | 9.45 |              |                          |       |         |       |      |      |
| ILMN_2759563 | <a href="#">2410008K03Rik</a> | 4.34 | 54.93   | 12.66  | 0.54 | 9.45 |              |                          |       |         |       |      |      |
| ILMN_2583163 | <a href="#">D430023I21Rik</a> | 4.33 | 34.78   | 8.03   | 0.62 | 9.45 |              |                          |       |         |       |      |      |
| ILMN_2674367 | <a href="#">Agrn</a>          | 4.31 | 206.43  | 47.88  | 0.49 | 9.45 |              |                          |       |         |       |      |      |
| ILMN_3138157 | <a href="#">Arf6ip2</a>       | 4.30 | 34.42   | 8.00   | 0.55 | 9.92 |              |                          |       |         |       |      |      |
| ILMN_2615557 | <a href="#">Dab2ip</a>        | 4.30 | 277.58  | 64.54  | 0.62 | 9.92 |              |                          |       |         |       |      |      |
| ILMN_1238479 | <a href="#">Mrst3</a>         | 4.30 | 40.69   | 9.47   | 0.66 | 9.92 |              |                          |       |         |       |      |      |
| ILMN_1228942 | <a href="#">Cd59a</a>         | 4.28 | 193.36  | 45.16  | 0.45 | 9.92 |              |                          |       |         |       |      |      |
| ILMN_2846812 | <a href="#">Sp100</a>         | 4.28 | 85.94   | 20.08  | 0.57 | 9.92 |              |                          |       |         |       |      |      |
| ILMN_2664224 | <a href="#">Ephx1</a>         | 4.28 | 122.70  | 28.70  | 0.51 | 9.92 |              |                          |       |         |       |      |      |
| ILMN_2419858 | <a href="#">E230020D15Rik</a> | 4.27 | 33.59   | 7.87   | 0.61 | 9.92 |              |                          |       |         |       |      |      |
| ILMN_2416876 | <a href="#">Gm967</a>         | 4.26 | 77.39   | 18.17  | 0.44 | 9.92 |              |                          |       |         |       |      |      |
| ILMN_2913089 | <a href="#">Brd9</a>          | 4.25 | 55.60   | 13.08  | 0.65 | 9.92 |              |                          |       |         |       |      |      |
| ILMN_2741464 | <a href="#">Fgd5</a>          | 4.23 | 74.06   | 17.50  | 0.50 | 9.92 |              |                          |       |         |       |      |      |
| ILMN_2702997 | <a href="#">Thap7</a>         | 4.23 | 58.84   | 13.92  | 0.42 | 9.92 |              |                          |       |         |       |      |      |
| ILMN_1242571 | <a href="#">Pkn3</a>          | 4.21 | 369.99  | 87.85  | 0.54 | 9.92 |              |                          |       |         |       |      |      |
| ILMN_1227126 | <a href="#">Ppp2r3a</a>       | 4.21 | 20.51   | 4.88   | 0.65 | 9.92 |              |                          |       |         |       |      |      |
| ILMN_2790188 | <a href="#">4921533L14Rik</a> | 4.20 | 143.07  | 34.07  | 0.41 | 9.92 |              |                          |       |         |       |      |      |
| ILMN_2742627 | <a href="#">Six2</a>          | 4.19 | 54.10   | 12.91  | 0.57 | 9.92 |              |                          |       |         |       |      |      |
| ILMN_1256136 | <a href="#">Nme7</a>          | 4.19 | 34.40   | 8.22   | 0.56 | 9.92 |              |                          |       |         |       |      |      |
| ILMN_1222004 | <a href="#">Rbbp9</a>         | 4.17 | 32.90   | 7.89   | 0.55 | 9.92 |              |                          |       |         |       |      |      |
| ILMN_2418725 | <a href="#">Zdhhc3</a>        | 4.17 | 35.63   | 8.54   | 0.54 | 9.92 |              |                          |       |         |       |      |      |
| ILMN_2706268 | <a href="#">Scara3</a>        | 4.17 | 84.36   | 20.24  | 0.48 | 9.92 |              |                          |       |         |       |      |      |
| ILMN_1225835 | <a href="#">Mfap5</a>         | 4.17 | 206.03  | 49.44  | 0.33 | 9.92 |              |                          |       |         |       |      |      |

**Table S2. Common mechanosensitive genes between 12hr and 48hr**

---

Up-regulated (LCA/RCA)

Down-regulated (LCA/RCA)

Ctgf

2310046K01Rik

Ctps

BC020535

Fosl2

Dab2ip

Got2

Dhh

Lmo4

E030024M20Rik

Eln

F2r1

Icam2

Id1

Inmt

Klf2

Klf4

Klk10

Kras

Lims2

Lsr

P4ha2

Pdlim2

Ptprj

Rab11fip5

Rhpn2

Slc9a3r2

Tek

Timp3

---



**Table S3. Taqman qPCR probes**

| <b>Assay Type</b> | <b>Gene Name</b>                                                                   | <b>Assay ID</b> |
|-------------------|------------------------------------------------------------------------------------|-----------------|
| Angpt2,mCG1200    | angiopoietin 2                                                                     | Mm00545822_m1   |
| Bcam,mCG4887      | basal cell adhesion molecule                                                       | Mm00522338_m1   |
| Bmp4,mCG4634      | bone morphogenetic protein 4                                                       | Mm00432087_m1   |
| Cd300a,mCG13614   | CD300A antigen                                                                     | Mm00468054_m1   |
| Col4a3,mCG118161  | collagen, type IV, alpha 3                                                         | Mm00483656_m1   |
| Ctgf,mCG6745      | connective tissue growth factor                                                    | Mm01192931_g1   |
| Cxcl12,mCG133006  | chemokine (C-X-C motif) ligand 12                                                  | Mm00445553_m1   |
| Cxcl16,mCG21161   | chemokine (C-X-C motif) ligand 16                                                  | Mm00469712_m1   |
| Dhh               | desert hedgehog                                                                    | Mm03053542_s1   |
| Dusp8,mCG130915   | dual specificity phosphatase 8                                                     | Mm00456230_m1   |
| Emp2,mCG123874    | epithelial membrane protein 2                                                      | Mm00801709_m1   |
| Epas1,mCG20417    | endothelial PAS domain protein 1                                                   | Mm00438717_m1   |
| Hdc,mCG2100       | histidine decarboxylase                                                            | Mm00456104_m1   |
| Icam1,mCG14043    | intercellular adhesion molecule 1                                                  | Mm00516023_m1   |
| Igf2,mCG11082     | insulin-like growth factor 2                                                       | Mm00439565_g1   |
| Jam2,mCG129050    | junction adhesion molecule 2                                                       | Mm00470197_m1   |
| Klf2,mCG18931     | Kruppel-like factor 2 (lung)                                                       | Mm00500486_g1   |
| Klk10,mCG22144    | kallikrein related-peptidase 10                                                    | Mm00505112_m1   |
| Lat2,mCG16701     | linker for activation of T cells family, member 2                                  | Mm00499104_m1   |
| Mif, mCG3124      | macrophage migration inhibitory factor,macrophage migration inhibitory factor-like | Mm01611157_gH   |
| Nos3,mCG16477     | nitric oxide synthase 3, endothelial cell                                          | Mm00435204_m1   |
| Pprc1,mCG10300    | peroxisome proliferative activated receptor, gamma, coactivator-related 1          | Mm00521078_m1   |
| Pthlh,mCG7104     | parathyroid hormone-like peptide                                                   | Mm00436057_m1   |
| Ramp2,mCG20228    | receptor (calcitonin) activity modifying protein 2                                 | Mm00490256_g1   |
| Rhpn2,mCG113678   | rhopilin, Rho GTPase binding protein 2                                             | Mm00518451_m1   |
| Tgfb1,mCG7649     | transforming growth factor, beta 1                                                 | Mm03024053_m1   |
| Tyrobp,mCG22805   | TYRO protein tyrosine kinase binding protein                                       | Mm00449152_m1   |
| Vcam1,mCG19764    | vascular cell adhesion molecule 1                                                  | Mm01320970_m1   |

**Table S4. SYBR Green qPCR probes**

| <b>Gene Symble</b> | <b>Gene ID</b>                 | <b>Gene Name</b>                                                                       | <b>Forward primer 5'-3'</b> | <b>Reverse primer 5'-3'</b> |
|--------------------|--------------------------------|----------------------------------------------------------------------------------------|-----------------------------|-----------------------------|
| Ankrd25            | <a href="#">NM_145611.4</a>    | Mus musculus KN motif and ankyrin repeat domains 2                                     | CCAGGTCCTGCATGTGCCCG        | TCCAGGTCCAGGCGGTAGCC        |
| Arhgef15           | <a href="#">NM_177566.3</a>    | Mus musculus Rho guanine nucleotide exchange factor (GEF) 15                           | GGCCCAGCAGGTTCTGACC         | ACCTGGGGTGGGAAGGCTC         |
| Ctps               | <a href="#">NM_016748.2</a>    | Mus musculus cytidine 5'-triphosphate synthase                                         | TCCCTGGGGTGCCAGGACTC        | ATGGCGAGGGCAACCACAGC        |
| Cyb5r3             | <a href="#">NM_029787.2</a>    | Mus musculus cytochrome b5 reductase 3                                                 | GTGCGTGAGGCCACCGTCTC        | GGTGATGGCCGGTGTGGAGC        |
| ICAM2              | <a href="#">NM_010494.1</a>    | Mus musculus intercellular adhesion molecule 2                                         | CACGGTGTCCCCTGTGCAGC        | CGTGGCTGTGGCCTCTTGGG        |
| KLF4               | <a href="#">NM_010637.3</a>    | Mus musculus Kruppel-like factor 4 (gut                                                | GCAGGTGCCCCGACTAACCG        | CTGCACCAGCTCCGCCACTC        |
| Lims2              | <a href="#">NM_144862.3</a>    | Mus musculus LIM and senescent cell antigen like domains 2                             | ACGCCAACTGGCATCCTGGC        | TTGTGGCAAGGCCGGCAGAG        |
| Lmo4               | <a href="#">NM_010723.3</a>    | Mus musculus LIM domain only 4 (Lmo4)                                                  | GCCGGCTCCCTCTCCTGGAA        | GGACGTGCCAATGTGCGCCA        |
| Mfap5              | <a href="#">NM_015776.2</a>    | Mus musculus microfibrillar associated protein 5                                       | GGCCACCGGCAGACAGATCG        | CCGCGTTGACCACTGACCCC        |
| Pak4               | <a href="#">NM_027470.3</a>    | Mus musculus p21 protein (Cdc42/Rac)-activated kinase 4                                | CCAGGAGGACCCCAGGAGGC        | GTGGTCCGTGTCAGCCCGTG        |
| Plec1              | <a href="#">NM_201394.2</a>    | Mus musculus plectin 1 (Plec1), transcript variant 11                                  | TCAGAGCCTCCGAGGGCAAGA       | GGTTGTGGCCATCACGGAGGTC      |
| Plek2              | <a href="#">NM_013738.3</a>    | Mus musculus pleckstrin 2 (Plek2)                                                      | ACGGCGTGCTCAAGGAAGGC        | CCTTGGGCGGGGTTACTCGC        |
| Ptprj              | <a href="#">NM_008982.5</a>    | Mus musculus protein tyrosine phosphatase, receptor type, J                            | TGCCCCACAGTCCCCTTCCC        | CTTCCTCCCCACCCCCACCC        |
| Rab11fip5          | <a href="#">NM_001003955.2</a> | Mus musculus RAB11 family interacting protein 5 (class I)                              | AGTGGGATCCTGGCCCCTGC        | TCTCCCTGGGGCTCTGTGCGC       |
| Sgcd               | <a href="#">NM_011891.4</a>    | Mus musculus sarcoglycan, delta (dystrophin-associated glycoprotein)                   | CTGCGTCTGCGCCAATGGGA        | TGCTGCCGGCAATTGTCCACT       |
| Slc9a3r2           | <a href="#">NM_023055.2</a>    | Mus musculus solute carrier family 9 (sodium/hydrogen exchanger), member 3 regulator 2 | GGGCGAGACGCATCACCAGG        | AGTGCAGGTCAGTTGCCGCC        |
| Tek                | <a href="#">NM_013690.2</a>    | Mus musculus endothelial-specific receptor tyrosine kinase                             | ACTTGCCGCATGCTCAGCCC        | TCGGGCCCCCACTTCTGAGC        |
| Timp3              | <a href="#">NM_011595.2</a>    | Mus musculus tissue inhibitor of metalloproteinase 3                                   | GCTGGAGCCTTGGGCACTGG        | AGGGCCCCTCCTTCACCAGC        |

**Table S5. Overrepresented Gene Ontology categories regulated by flow-disturbance in mouse carotid endothelium**

| <i>12hr post-ligation</i>               | <i>No. of Genes</i> | <i>48hr post-ligation</i>               | <i>No. of Genes</i> |
|-----------------------------------------|---------------------|-----------------------------------------|---------------------|
| <b>Diseases and Disorders</b>           |                     | <b>Diseases and Disorders</b>           |                     |
| Developmental Disorder                  | 10                  | Immunological Disease                   | 40                  |
| Cancer                                  | 9                   | Inflammatory Response                   | 75                  |
| Immunological Disease                   | 4                   | Connective Tissue Disorders             | 22                  |
| Cardiovascular Disease                  | 6                   | Inflammatory Disease                    | 36                  |
| Respiratory Disease                     | 4                   | Skeletal and Muscular Disorders         | 34                  |
| <b>Molecular and Cellular Functions</b> |                     | <b>Molecular and Cellular Functions</b> |                     |
| Cellular Growth and Proliferation       | 12                  | Cellular Movement                       | 70                  |
| Cellular Development                    | 20                  | Cell-To-Cell Signaling and Interaction  | 76                  |
| Cell Morphology                         | 12                  | Antigen Presentation                    | 30                  |
| Cellular Function and Maintenance       | 6                   | Cellular Function and Maintenance       | 44                  |
| Cell Cycle                              | 4                   | Cellular Growth and Proliferation       | 73                  |

**Table S6. Comparison of flow-sensitive genes found in vivo mouse carotid endothelium to cultured HUVEC**

| Gene Symbol                    | Gene Name                                                                      | Carotid 48hr (LCA/RCA) microarray | Carotid 48hr (LCA/RCA) qPCR | HUVEC 24hr (OS/LS) microarray | Congruency |
|--------------------------------|--------------------------------------------------------------------------------|-----------------------------------|-----------------------------|-------------------------------|------------|
| <b>Downregulated (LCA/RCA)</b> |                                                                                |                                   |                             |                               |            |
| KLK10                          | kallikrein related-peptidase 10                                                | 0.10                              | 0.01                        | ND                            | N          |
| Col4a3                         | collagen, type IV, alpha 3                                                     | 0.22                              | 0.11                        | ND                            | N          |
| Bcam                           | basal cell adhesion molecule                                                   | 0.23                              | 0.10                        | 0.81                          | Y          |
| Pthlh                          | parathyroid hormone-like peptide                                               | 0.24                              | 0.08                        | 0.06                          | Y          |
| Rhpn2                          | rhopilin, Rho GTPase binding protein 2                                         | 0.26                              | 0.12                        | 1.52                          | N          |
| KLF2                           | kruppel-like factor 2                                                          | 0.27                              | 0.06                        | 0.37                          | Y          |
| Dusp8                          | dual specificity phosphatase 8                                                 | 0.27                              | 0.12                        | 0.70                          | Y          |
| KLF4                           | kruppel-like factor 4                                                          | 0.28                              | 0.06                        | 0.12                          | Y          |
| IGF2                           | insulin-like growth factor 2                                                   | 0.29                              | 0.15                        | 0.78                          | Y          |
| Slc9a3r2                       | solute carrier family 9 (sodium/hydrogen exchanger), member 3 regulator 2      | 0.32                              | 0.11                        | 0.22                          | Y          |
| Ptprj                          | protein tyrosine phosphatase, receptor type, J                                 | 0.33                              | 0.13                        | ND                            | N          |
| Mfap5                          | microfibrillar associated protein 5                                            | 0.33                              | 0.13                        | 0.94                          | N          |
| Dhh                            | desert hedgehog                                                                | 0.36                              | 0.11                        | 0.16                          | Y          |
| Emp2                           | epithelial membrane protein 2                                                  | 0.40                              | 0.22                        | 1.09                          | N          |
| Lims2                          | LIM and senescent cell antigen like domains 2                                  | 0.40                              | 0.09                        | 0.45                          | Y          |
| Jam2                           | junction adhesion molecule 2                                                   | 0.40                              | 0.17                        | 0.45                          | Y          |
| Pak4                           | p21 (CDKN1A)-activated kinase 4                                                | 0.42                              | 0.36                        | 0.78                          | Y          |
| Ramp2                          | receptor (calcitonin) activity modifying protein 2                             | 0.44                              | 0.16                        | 0.33                          | Y          |
| NOS3                           | nitric oxide synthase 3                                                        | 0.46                              | 0.28                        | 0.25                          | Y          |
| ICAM2                          | intercellular adhesion molecule 2                                              | 0.48                              | 0.19                        | 1.04                          | N          |
| Plek2                          | pleckstrin 2                                                                   | 0.50                              | 0.24                        | 0.52                          | Y          |
| Epas1                          | endothelial PAS domain protein 1                                               | 0.50                              | 0.20                        | 0.59                          | Y          |
| Ankrd25                        | ankyrin repeat domain 25                                                       | 0.52                              | 0.22                        | ND                            | N          |
| Sgcd                           | sarcoglycan, delta                                                             | 0.52                              | 0.16                        | 0.97                          | N          |
| Tek                            | endothelial-specific receptor tyrosine kinase                                  | 0.53                              | 0.23                        | 0.30                          | Y          |
| Timp3                          | tissue inhibitor of metalloproteinase 3                                        | 0.55                              | 0.30                        | 1.26                          | N          |
| Arhgef15                       | Rho guanine nucleotide exchange factor (GEF) 15                                | 0.60                              | 0.29                        | 1.12                          | N          |
| Cyb5r3                         | cytochrome b5 reductase 3                                                      | 0.61                              | 0.40                        | 0.71                          | Y          |
| Plec1                          | plectin 1                                                                      | 0.62                              | 0.36                        | 0.50                          | Y          |
| Rab11fip5                      | RAB11 family interacting protein 5 (class I) (Rab11fip5), transcript variant 1 | 0.65                              | 0.56                        | 0.73                          | Y          |
| <b>Upregulated (LCA/RCA)</b>   |                                                                                |                                   |                             |                               |            |
| Angpt2                         | angiopoietin 2                                                                 | 8.44                              | 7.81                        | 4.53                          | Y          |
| Ctgf                           | connective tissue growth factor                                                | 6.00                              | 22.88                       | 3.87                          | Y          |
| Cd300a                         | CD300A antigen                                                                 | 4.31                              | 11.36                       | ND                            | N          |

|        |                                              |      |       |      |   |
|--------|----------------------------------------------|------|-------|------|---|
| Tyrobp | TYRO protein tyrosine kinase binding protein | 3.64 | 37.05 | ND   | N |
| Cxcl12 | chemokine (C-X-C motif) ligand 12            | 3.43 | 4.33  | 1.14 | N |
| Cxcl16 | chemokine (C-X-C motif) ligand 16            | 2.20 | 1.74  | 0.56 | N |
| Ctps   | cytidine 5'-triphosphate synthase 2          | 1.98 | 1.64  | 1.63 | Y |
| Lmo4   | LIM domain only 4                            | 1.70 | 1.87  | 1.18 | N |
| VCAM1  | vascular cell adhesion molecule 1            | 1.53 | 1.90  | 0.87 | N |
| BMP4   | Bone morphogenetic protein 4                 | 1.37 | 1.25  | 4.57 | Y |

**Table S7. Comparison of gene expressions between different microarray studies**

| Gene Symbol                    | Gene Name                                                     | Mouse Carotid 48hr (LCA/RCA) microarray | HUVEC 24hr (OS/LS) microarray | HUVEC 24hr (RF/HSS) microarray | Pig Aorta (DF/UF) microarray | Category *   |
|--------------------------------|---------------------------------------------------------------|-----------------------------------------|-------------------------------|--------------------------------|------------------------------|--------------|
| <b>Downregulated (LCA/RCA)</b> |                                                               |                                         |                               |                                |                              |              |
| KLK10                          | kallikrein related-peptidase 10                               | 0.10                                    | ND                            | ND                             | NA                           | -            |
| Col4a3                         | collagen, type IV, alpha 3                                    | 0.22                                    | ND                            | ND                             | NA                           | -            |
| Bcam                           | basal cell adhesion molecule                                  | 0.23                                    | 0.81                          | 1.60                           | NA                           | <b>b</b>     |
| Pthlh                          | parathyroid hormone-like peptide                              | 0.24                                    | 0.06                          | 0.23                           | NA                           | <b>b,c</b>   |
| Rhpn2                          | rhopilin, Rho GTPase binding protein 2                        | 0.26                                    | 1.52                          | 1.56                           | NA                           | -            |
| KLF2                           | kruppel-like factor 2                                         | 0.27                                    | 0.37                          | 0.69                           | NA                           | <b>b,c</b>   |
| Dusp8                          | dual specificity phosphatase 8                                | 0.27                                    | 0.70                          | 0.57                           | NA                           | <b>b,c</b>   |
| KLF4                           | kruppel-like factor 4                                         | 0.28                                    | 0.12                          | 0.45                           | 0.59                         | <b>a,b,c</b> |
| IGF2                           | insulin-like growth factor 2                                  | 0.29                                    | 0.78                          | 0.63                           | 2.18                         | <b>b,c</b>   |
| Slc9a3r2                       | solute carrier family 9 (sodium/hydrogen exchanger), member 3 | 0.32                                    | 0.22                          | 0.63                           | NA                           | <b>b,c</b>   |
| Ptprj                          | regulator 2 protein tyrosine phosphatase, receptor type, J    | 0.33                                    | ND                            | 0.98                           | NA                           | -            |
| Mfap5                          | microfibrillar associated protein 5                           | 0.33                                    | 0.94                          | ND                             | NA                           | -            |
| Dhh                            | desert hedgehog                                               | 0.36                                    | 0.16                          | 1.37                           | NA                           | <b>b</b>     |
| Emp2                           | epithelial membrane protein 2                                 | 0.40                                    | 1.09                          | 0.76                           | NA                           | <b>c</b>     |
| Lims2                          | LIM and senescent cell antigen like domains 2                 | 0.40                                    | 0.45                          | 0.45                           | NA                           | <b>b,c</b>   |
| Jam2                           | junction adhesion molecule 2                                  | 0.40                                    | 0.45                          | 0.59                           | NA                           | <b>b,c</b>   |
| Pak4                           | p21 (CDKN1A)-activated kinase 4                               | 0.42                                    | 0.78                          | 1.12                           | NA                           | <b>b</b>     |
| Ramp2                          | receptor (calcitonin) activity modifying protein 2            | 0.44                                    | 0.33                          | 0.73                           | NA                           | <b>b,c</b>   |
| NOS3                           | nitric oxide synthase 3                                       | 0.46                                    | 0.25                          | 0.44                           | 0.78                         | <b>b,c</b>   |
| ICAM2                          | intercellular adhesion molecule 2                             | 0.48                                    | 1.04                          | 0.75                           | NA                           | <b>c,</b>    |
| Plek2                          | pleckstrin 2                                                  | 0.50                                    | 0.52                          | 0.53                           | NA                           | <b>b,c</b>   |
| Epas1                          | endothelial PAS domain protein 1                              | 0.50                                    | 0.59                          | 0.71                           | NA                           | <b>b,c</b>   |
| Ankrd25                        | ankyrin repeat domain 25                                      | 0.52                                    | ND                            | 0.58                           | NA                           | <b>c</b>     |
| Sgcd                           | sarcoglycan, delta                                            | 0.52                                    | 0.97                          | ND                             | NA                           | -            |
| Tek                            | endothelial-specific receptor tyrosine kinase                 | 0.53                                    | 0.30                          | 0.36                           | NA                           | <b>b,c</b>   |
| Timp3                          | tissue inhibitor of metalloproteinase 3                       | 0.55                                    | 1.26                          | ND                             | NA                           | -            |
| Arhgef15                       | Rho guanine nucleotide exchange factor (GEF) 15               | 0.60                                    | 1.12                          | 0.82                           | NA                           | -            |
| Cyb5r3                         | cytochrome b5 reductase 3                                     | 0.61                                    | 0.71                          | 1.75                           | NA                           | <b>b</b>     |

|           |                                                              |      |      |      |    |            |
|-----------|--------------------------------------------------------------|------|------|------|----|------------|
| Plec1     | plectin 1<br>RAB11 family interacting<br>protein 5 (class I) | 0.62 | 0.50 | 1.69 | NA | <b>b</b>   |
| Rab11fip5 | (Rab11fip5), transcript<br>variant 1                         | 0.65 | 0.73 | 0.70 | NA | <b>b,c</b> |

**Upregulated (LCA/RCA)**

|        |                                                 |      |      |      |      |            |
|--------|-------------------------------------------------|------|------|------|------|------------|
| Angpt2 | angiopoietin 2                                  | 8.44 | 4.53 | 1.69 | 0.61 | <b>b,c</b> |
| Ctgf   | connective tissue growth<br>factor              | 6.00 | 3.87 | 0.79 | 1.59 | <b>b</b>   |
| Cd300a | CD300A antigen                                  | 4.31 | ND   | 2.02 | NA   | <b>c</b>   |
| Tyrobp | TYRO protein tyrosine<br>kinase binding protein | 3.64 | ND   | 2.04 | NA   | <b>c</b>   |
| Cxcl12 | chemokine (C-X-C motif)<br>ligand 12            | 3.43 | 1.14 | 0.65 | NA   | -          |
| Cxcl16 | chemokine (C-X-C motif)<br>ligand 16            | 2.20 | 0.56 | 1.84 | NA   | <b>c</b>   |
| Ctps   | cytidine 5'-triphosphate<br>synthase 2          | 1.98 | 1.63 | 1.06 | NA   | <b>b</b>   |
| Lmo4   | LIM domain only 4                               | 1.70 | 1.18 | 0.97 | NA   | -          |
| VCAM1  | vascular cell adhesion<br>molecule 1            | 1.53 | 0.87 | ND   | NA   | -          |
| BMP4   | Bone morphogenetic<br>protein 4                 | 1.37 | 4.57 | 0.91 | NA   | <b>b</b>   |

- 
- \* **a** : gene expression is consistent between mouse and pig (2)  
**b** : gene expression is consistent between mouse and HUVEC (OS/LS) (23)  
**c** : gene expression is consistent between mouse and HUVEC (RF/HF) (21)

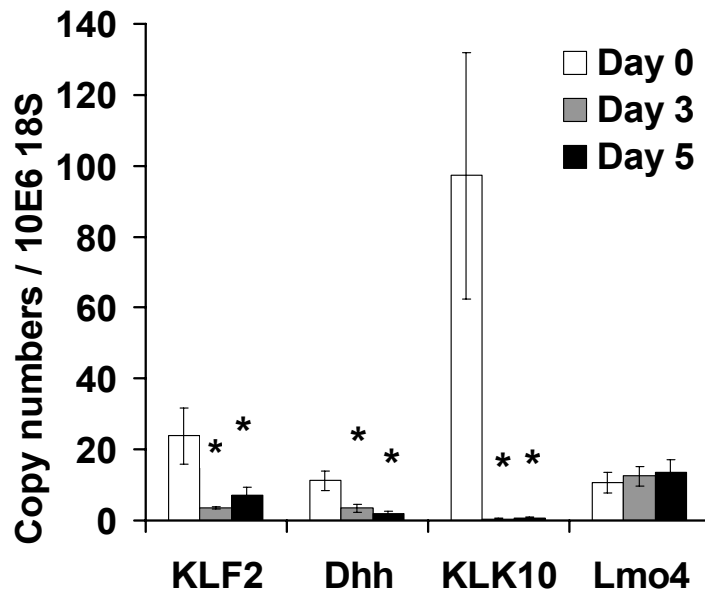

**Fig. S1 Endothelial expression of *KLF2*, *Dhh*, and *KLK10*, but not *Lmo4*, decreased during *ex vivo* tissue culture.** Mouse carotid rings were incubated *ex vivo* in a growth medium. Intimal RNAs were collected after 0, 3, and 5 days during culture. qPCR analyses were carried out to examine the mRNA levels of *KLF2*, *Dhh*, *KLK10* and *Lmo4*. mRNA copy numbers were normalized against 18S and were shown as mean  $\pm$  SEM (n=3), \* p<0.05 (vs. Day 0).



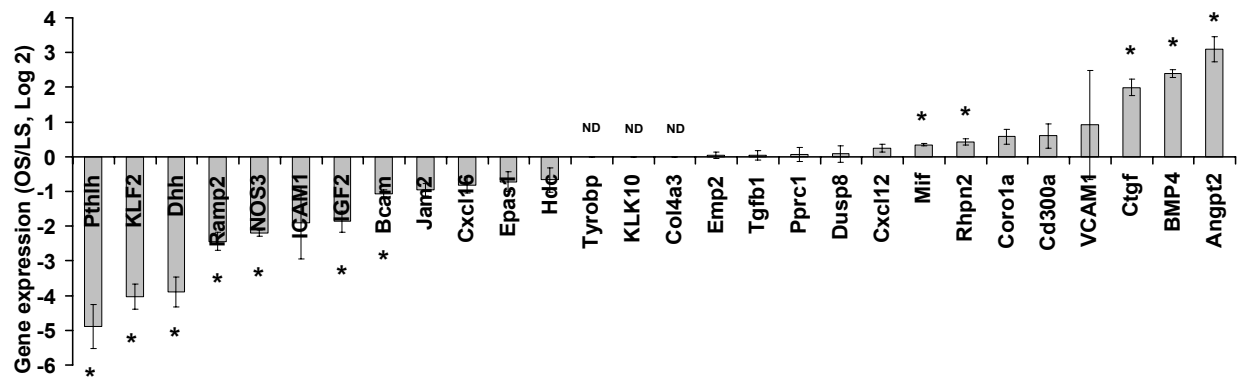

**Fig. S2 Validation of shear-sensitive mRNAs in HUVEC by qPCR.** Total RNAs were collected from HUVECs exposed to OS or LS for 24hr. qPCR analysis was then performed using SYBR green with custom design primers. mRNA copy numbers were normalized against 18S and are shown as mean  $\pm$  SEM (n=4).  $p^* < 0.05$  (OS vs, LS). ND is not detectable in qPCR.

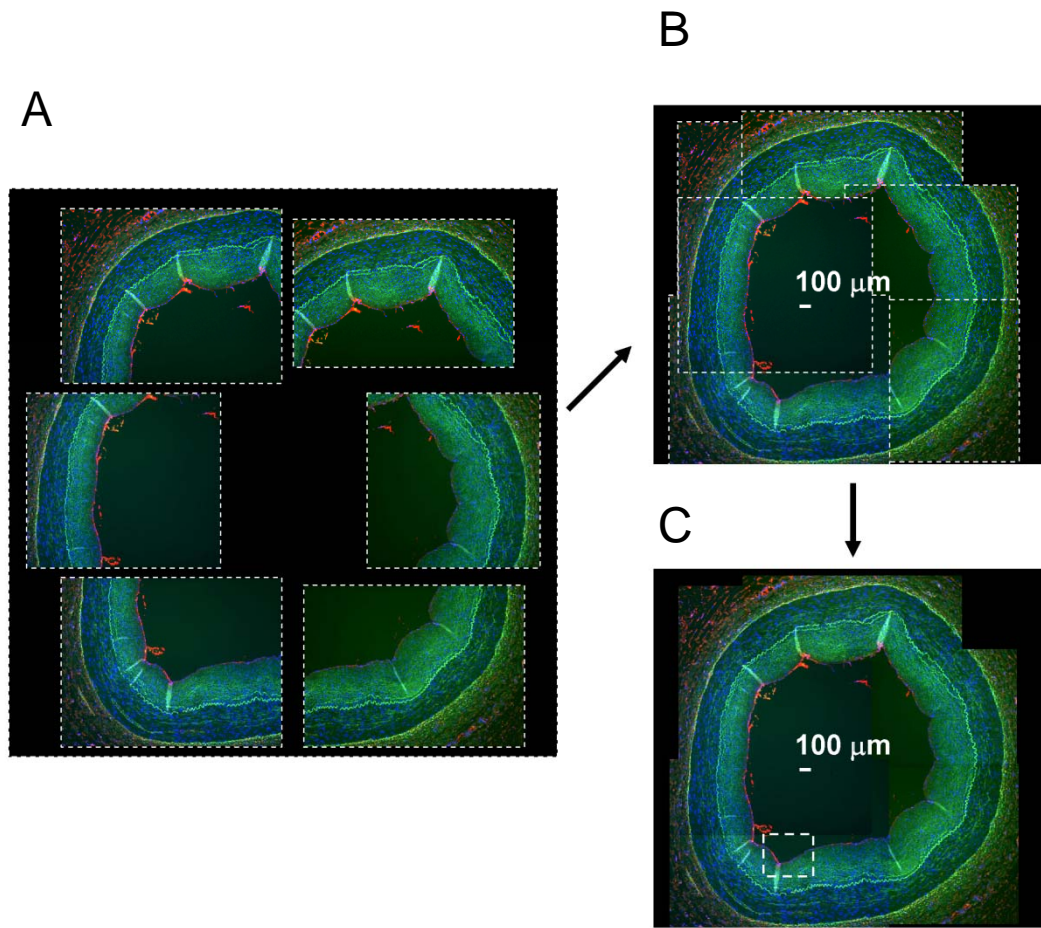

**Fig. S3. The raw images of the composite figure shown in Fig 4B.** Paraffin sections of human left anterior descending coronary artery were stained for Lmo4 protein expression. A) Fluorescence photomicroscopic images were taken from six different but overlapping regions of the stained section. B) The six images were then overlapped together to make a composite image in order to show an overall staining pattern of the entire coronary artery section. C) White dashed lines indicate the edges of each image. C. White dashed lines were removed for a cleaner view and the final picture is shown in Figure 4B.
